# Supplementary material for: The impact of job crafting on knowledge hiding behavior in organizations: A moderated mediation model
Source: Research Square preprint supplement (doi:10.21203/rs.3.rs-6075642/v1), 2025-03-07
Supplement: Supplementary file 1 [file 9eb046a67124aa838276dc83.xlsx]

## Sheet: 筛选后数据320份
JobAuto1	JobAuto2	JobAuto3	JobCra1	JobCra2	JobCra3	JobCra4	JPO1	JPO2	JPO3	JPO4	JPO5	JPO6	KH1	KH2	KH3	KH4	KH5	KH6	KH7	KH8	KH9	KH10	KH11	KH12	EthLea1	EthLea2	EthLea3	EthLea4	EthLea5	EthLea6	EthLea7	EthLea8	EthLea9	EthLea10	Mindfulness1	Mindfulness2	Mindfulness3	Mindfulness4	Mindfulness5	Mindfulness6	Mindfulness7	Mindfulness8	Mindfulness9	Mindfulness10	Mindfulness11	Mindfulness12	Mindfulness13	Mindfulness14	Mindfulness15
3	3	4	4	3	3	4	3	3	4	4	3	3	4	4	3	3	4	5	4	4	5	4	4	3	4	4	3	4	4	5	3	4	4	3	4	4	3	4	5	3	4	4	3	3	4	4	4	3	4
4	4	4	4	4	4	4	4	4	4	4	4	4	4	4	4	4	4	4	4	4	4	4	4	4	4	4	4	4	4	4	4	4	4	4	4	4	4	4	4	4	4	4	4	4	4	4	4	4	4
4	4	3	4	4	3	5	4	5	4	4	4	5	2	2	1	1	2	1	2	3	4	4	3	4	4	3	5	3	4	4	5	4	4	3	4	3	4	4	4	5	4	4	4	4	5	4	4	3	5
4	4	3	3	4	4	2	4	3	5	4	4	4	1	2	1	2	1	1	1	2	1	1	1	2	4	3	4	3	4	5	2	4	4	2	3	3	4	5	4	4	4	2	4	4	4	5	4	4	5
4	4	4	4	3	5	3	5	4	5	4	3	3	1	1	1	1	1	1	1	1	1	2	1	1	2	2	5	2	4	4	4	5	5	4	4	4	4	3	3	4	5	5	4	5	4	5	4	4	5
1	3	5	4	5	4	1	5	5	5	5	5	5	1	1	1	1	1	1	1	1	1	1	1	1	5	5	5	5	5	5	5	5	5	5	3	4	1	1	3	2	4	5	5	5	3	5	2	3	5
4	4	3	3	4	5	2	5	4	5	4	4	5	4	2	2	1	1	2	2	3	1	3	2	3	5	4	5	4	5	4	3	3	5	4	3	3	3	5	3	2	3	3	4	2	1	3	3	4	5
4	4	4	3	3	3	1	4	3	4	4	4	2	1	2	1	2	1	1	1	2	3	3	3	2	4	4	2	3	2	4	2	4	4	3	3	4	4	5	2	2	4	4	3	4	2	4	4	5	5
2	3	2	2	2	3	3	4	1	4	4	2	2	2	1	1	2	1	2	1	2	2	2	1	1	4	5	4	4	4	3	5	4	4	5	3	3	4	3	4	4	5	4	4	5	3	4	3	4	5
4	4	4	3	3	3	2	3	3	4	3	3	4	4	1	2	1	1	1	1	1	1	2	1	1	5	4	4	4	4	4	3	4	4	3	3	3	4	3	3	2	4	4	4	4	2	4	3	4	4
3	2	3	3	4	5	3	3	4	3	5	3	3	3	3	2	2	3	2	2	3	2	3	2	2	3	4	3	4	2	3	4	3	3	4	2	2	3	4	2	1	2	2	3	3	3	4	2	2	4
5	4	4	4	5	4	3	5	4	5	4	5	5	1	1	1	1	2	1	1	1	1	2	1	2	4	5	4	2	4	4	4	4	4	4	4	2	2	3	3	3	2	2	3	4	3	4	3	4	5
3	4	4	5	3	5	3	4	4	5	4	3	4	3	2	1	2	2	2	1	3	3	5	3	3	3	4	3	5	4	2	4	2	1	3	3	4	4	5	5	4	3	4	4	5	3	4	1	4	5
3	4	4	4	4	4	4	4	4	4	4	4	4	3	3	3	3	1	1	2	3	2	2	2	2	4	5	5	4	4	5	4	4	5	4	3	3	3	3	3	3	4	4	3	4	3	3	3	3	3
4	4	4	2	4	4	1	4	2	4	2	4	4	2	2	4	4	4	4	4	4	2	1	1	2	4	5	5	4	4	4	4	4	2	4	2	2	4	4	1	2	4	3	3	4	4	2	1	2	4
1	2	3	4	4	4	4	5	4	5	5	5	5	1	1	1	1	1	1	1	1	1	1	1	1	5	5	5	5	5	5	5	5	5	5	3	3	1	5	3	3	5	5	4	4	3	5	4	4	4
5	4	5	5	5	5	4	5	5	4	5	5	5	5	5	4	5	4	5	5	5	4	5	5	5	5	4	5	5	4	5	5	4	4	5	2	3	3	2	5	2	2	1	2	1	3	3	2	3	2
3	2	4	4	3	4	4	4	2	5	5	4	4	5	1	4	2	1	1	1	2	2	2	2	1	3	2	4	4	5	5	5	4	4	5	3	3	3	3	1	3	3	4	3	5	4	4	4	4	5
3	4	3	4	3	4	3	4	2	4	3	4	3	3	4	3	4	3	4	3	4	2	4	3	4	3	4	2	4	3	4	3	4	3	4	3	4	3	4	3	4	3	4	3	2	3	2	3	2	3
3	4	4	3	4	3	2	4	4	4	4	3	4	4	2	2	2	3	2	2	3	4	2	3	2	4	4	4	4	5	5	5	4	4	4	3	3	4	4	3	4	4	4	4	4	3	3	4	3	4
4	3	4	4	4	4	3	3	3	4	3	3	3	2	1	1	1	1	1	1	1	1	1	1	1	4	4	4	4	4	4	4	4	4	3	3	4	4	2	2	2	4	3	3	3	2	3	2	3	3
3	4	4	3	5	4	2	4	4	3	3	2	2	2	2	2	3	2	2	1	3	3	4	2	3	4	5	4	4	5	5	5	5	5	4	3	3	4	3	2	2	3	4	3	4	3	3	3	4	5
3	3	3	4	4	4	4	3	2	3	2	3	3	1	1	1	1	1	1	1	1	1	1	1	1	3	2	3	4	3	3	3	3	3	3	3	2	2	3	4	5	3	2	4	3	4	3	4	4	1
4	4	4	4	4	4	4	1	2	2	1	1	1	1	2	1	1	2	2	1	3	2	1	1	2	2	2	3	1	2	1	3	3	2	2	5	4	3	4	4	2	4	3	2	3	4	4	3	4	5
5	4	5	5	5	5	4	5	5	4	5	5	5	5	5	4	5	4	5	5	5	4	5	5	5	5	4	5	5	4	5	5	4	4	5	2	3	3	2	5	2	2	1	2	1	3	3	2	3	2
4	5	4	4	5	5	4	4	5	5	2	2	4	2	2	1	2	2	1	2	2	2	5	2	4	4	5	5	4	5	4	5	4	5	4	4	4	5	4	4	2	4	2	2	4	2	4	2	3	4
5	3	4	4	3	4	5	4	5	4	4	3	4	5	4	3	4	5	4	5	4	4	4	5	4	4	3	5	4	4	4	5	4	5	3	4	5	4	4	5	4	5	3	4	4	3	4	4	3	4
5	4	5	4	4	4	4	4	4	4	5	4	4	1	1	1	1	1	1	1	1	1	1	1	1	5	5	5	4	4	4	5	4	4	4	4	4	4	4	4	4	4	4	4	4	4	4	4	4	4
3	2	2	3	3	4	2	3	3	4	4	4	3	4	2	2	1	2	3	2	3	2	3	4	3	3	4	4	4	4	5	5	5	5	5	3	4	3	4	2	3	4	4	3	4	4	5	2	3	4
4	5	4	5	4	4	3	3	2	3	1	2	2	2	3	4	2	2	1	2	3	3	3	2	3	4	5	2	4	2	2	3	2	2	2	3	2	2	4	2	2	2	1	3	1	2	3	2	1	4
3	4	4	4	3	3	4	4	5	4	3	4	4	3	4	3	3	2	3	3	2	3	2	3	3	4	3	4	4	4	4	4	4	5	4	4	5	4	4	3	3	3	2	3	2	3	3	3	4	5
3	5	4	3	3	4	5	4	3	5	4	3	2	3	3	4	1	2	3	4	4	5	5	4	5	4	4	4	2	4	5	5	4	4	4	4	4	4	3	5	5	3	4	4	3	4	5	4	4	5
4	4	5	4	3	4	5	4	4	4	5	4	3	2	3	3	3	1	2	2	4	3	4	3	3	4	5	4	4	4	4	4	4	4	4	1	3	3	4	2	2	3	2	4	5	4	2	1	3	3
4	5	4	5	4	5	4	5	4	4	4	5	4	5	5	4	4	2	5	2	4	3	4	4	4	5	4	4	4	5	4	4	3	5	5	5	4	4	4	5	2	4	4	5	5	4	4	5	4	4
4	3	4	4	5	5	3	4	4	4	4	3	3	1	1	1	1	1	1	1	2	2	3	3	3	3	3	4	2	3	4	2	4	4	3	3	3	3	5	4	3	3	3	2	2	3	3	2	3	4
4	4	4	4	4	4	4	4	5	4	4	3	4	4	4	5	4	4	4	3	3	4	4	4	4	3	2	2	2	2	4	3	4	4	4	3	2	4	4	4	3	3	3	4	4	3	3	3	3	3
4	4	4	5	4	5	3	3	4	4	4	3	2	2	3	4	2	3	2	2	2	3	2	2	2	3	3	3	4	3	3	4	3	3	3	3	3	2	4	2	1	3	3	2	3	4	3	2	2	4
1	1	2	2	3	1	1	5	3	1	1	1	1	5	5	5	5	5	5	5	5	4	5	4	4	3	5	5	5	4	4	5	5	5	5	4	4	4	4	4	4	4	4	4	4	4	4	5	5	5
5	5	5	5	5	5	5	2	3	3	2	3	2	1	1	1	1	1	1	1	1	1	1	1	1	5	2	3	4	4	4	4	4	4	5	1	5	5	1	1	5	5	5	1	5	1	5	3	5	5
2	3	2	2	2	3	2	3	1	1	1	1	1	1	1	1	1	1	1	1	1	1	1	1	1	3	1	3	3	2	2	1	1	1	1	5	2	5	3	1	5	1	1	5	1	1	1	1	1	5
4	4	5	5	4	5	4	4	4	4	4	4	5	2	2	2	1	1	1	1	1	2	1	1	1	4	4	2	4	4	4	4	2	2	4	4	4	5	4	4	5	4	5	4	5	5	4	5	4	4
3	2	3	3	4	2	3	2	3	3	2	3	3	4	2	3	4	3	4	3	3	3	2	3	3	3	3	5	3	3	2	3	3	4	3	3	4	3	2	4	3	3	2	2	3	2	4	3	3	4
4	4	4	5	4	4	2	4	4	4	4	4	3	2	3	3	3	1	1	1	2	2	3	3	2	4	4	4	2	2	2	2	3	2	2	4	2	4	2	2	2	4	4	4	4	2	4	4	4	4
4	4	4	3	4	3	3	4	4	4	4	4	4	2	2	2	2	1	1	1	1	2	2	2	2	3	3	4	4	3	3	4	3	3	3	4	4	2	2	4	4	4	4	4	4	4	4	4	4	4
3	3	2	4	4	4	2	2	2	4	3	2	3	2	2	2	2	3	1	2	3	1	3	2	1	3	4	4	4	4	4	4	3	4	5	4	3	4	1	2	3	4	2	2	4	2	3	2	3	4
5	5	5	5	5	5	5	5	5	5	5	5	5	5	5	5	5	1	1	1	1	1	1	1	1	5	5	5	5	5	5	5	5	5	5	5	5	5	5	5	5	5	5	5	5	5	5	5	5	5
5	5	5	5	5	5	5	5	5	5	5	5	5	1	1	1	1	3	1	1	1	5	5	3	5	5	5	5	5	5	5	5	5	5	5	1	1	1	1	2	1	1	1	5	5	5	5	1	3	1
4	4	4	4	4	4	4	4	4	4	4	4	4	2	2	2	2	2	2	2	2	2	2	3	3	4	3	2	2	3	3	3	3	3	3	4	5	5	5	3	3	3	3	4	4	4	4	4	4	4
4	5	4	5	4	5	4	5	4	5	4	5	4	5	4	5	5	4	5	4	5	4	5	4	5	5	4	5	4	5	4	5	4	5	4	5	4	5	4	5	4	5	4	5	4	5	4	5	4	5
2	2	1	1	2	2	3	2	2	3	3	3	2	2	3	2	3	2	3	3	2	2	3	2	2	2	2	2	2	2	2	2	2	2	2	2	2	2	2	2	2	2	2	2	2	2	2	2	2	2
5	3	3	2	2	3	3	2	2	2	2	2	2	2	2	2	2	2	2	2	2	2	2	2	2	3	3	3	3	3	3	3	3	3	3	3	3	4	4	1	1	3	3	3	3	3	3	3	3	3
4	4	4	4	4	4	4	4	4	4	4	4	4	4	4	4	4	4	4	4	4	4	4	4	4	4	4	4	4	4	4	4	4	4	4	4	4	4	4	4	4	4	4	4	4	4	4	4	4	4
4	5	4	4	5	5	4	5	4	5	5	5	4	4	4	1	2	2	1	2	2	2	4	2	1	4	4	5	4	4	5	4	5	4	5	4	5	5	2	4	4	5	5	4	5	2	4	5	5	4
4	4	4	3	3	3	3	5	5	5	5	5	5	2	2	2	2	1	1	1	2	1	2	2	2	4	5	5	4	5	5	5	5	5	5	5	5	4	4	4	4	5	5	2	4	4	4	3	4	5
5	4	5	5	5	5	5	5	4	5	5	4	5	1	1	1	1	1	1	1	1	1	5	1	1	5	5	5	4	5	5	5	5	5	5	5	1	1	1	1	1	5	5	5	5	1	5	5	5	5
4	4	4	4	4	4	4	4	4	4	3	4	4	4	4	4	4	4	3	4	4	4	4	4	3	4	4	4	3	4	3	4	4	4	3	3	4	3	4	4	4	3	5	5	4	4	3	3	4	4
5	5	5	5	5	5	5	5	5	5	5	5	5	1	1	1	1	1	1	1	1	5	5	5	5	5	5	5	5	5	5	5	5	5	5	5	5	5	5	5	5	5	5	5	5	5	5	5	5	5
4	3	4	3	4	4	2	4	3	4	4	3	4	4	2	3	4	3	3	2	4	3	3	3	4	4	4	3	4	4	4	4	4	4	3	4	4	4	2	4	2	4	3	2	3	2	4	3	4	4
3	3	3	3	3	3	3	3	3	3	3	3	3	3	3	3	3	3	3	3	3	3	3	3	3	3	3	3	3	3	3	3	3	3	3	3	3	3	3	3	3	3	3	3	3	3	3	3	3	3
4	5	5	5	5	5	2	5	4	5	4	5	4	5	1	1	1	1	1	1	1	1	3	3	3	5	5	5	2	5	5	5	5	4	4	4	2	3	2	5	4	4	5	5	4	3	5	5	4	4
4	2	2	4	4	4	4	3	2	3	2	2	2	2	2	2	2	2	2	1	4	2	2	2	3	3	4	4	3	2	2	4	4	3	4	3	2	4	4	3	1	3	4	2	2	4	2	2	2	4
3	3	4	3	3	3	4	2	3	4	3	4	3	4	3	4	3	3	4	3	3	4	4	3	4	3	4	3	3	4	4	4	3	3	4	3	4	4	5	3	3	3	3	2	3	3	4	2	3	3
4	4	4	4	4	4	4	4	4	4	4	5	4	3	2	2	2	2	2	2	1	1	1	2	2	5	5	5	5	5	5	5	5	5	5	4	3	4	4	4	5	4	4	2	4	2	4	3	4	4
5	4	5	5	4	5	4	4	4	5	4	3	4	2	1	1	2	5	5	4	3	5	4	5	4	5	4	5	4	5	4	5	4	5	4	4	3	3	5	5	4	5	4	4	5	1	4	1	3	4
3	3	3	3	4	4	3	5	3	4	4	4	4	2	2	2	2	2	2	2	2	2	3	4	3	4	4	4	4	4	4	4	4	4	4	4	4	4	3	2	3	3	3	3	3	3	3	3	3	3
5	4	5	5	2	4	4	5	4	5	5	5	4	1	2	1	2	1	1	2	1	1	2	1	1	4	5	4	4	5	5	4	5	5	4	3	4	3	4	4	2	4	3	3	3	2	4	3	3	2
5	5	5	4	4	5	4	5	4	4	5	4	4	4	4	5	4	4	5	4	4	5	4	4	5	5	4	5	4	4	4	5	4	4	5	5	4	4	4	4	5	4	4	5	4	4	5	5	4	4
3	4	4	3	4	4	1	3	3	3	4	2	2	4	4	2	1	2	1	1	3	3	2	3	3	2	3	3	2	4	2	3	1	3	4	3	2	3	4	3	2	1	2	3	4	5	4	3	2	1
4	3	4	4	4	4	5	4	4	4	5	4	4	4	4	4	5	4	4	3	4	4	4	4	3	4	4	4	5	4	4	5	4	4	4	4	3	4	4	4	5	4	4	3	4	4	4	4	3	4
5	4	5	4	5	4	5	5	4	4	5	4	5	4	5	4	5	4	5	4	5	4	4	5	4	5	4	4	5	4	5	4	5	4	5	4	5	4	5	4	5	4	5	4	5	4	5	5	4	5
4	4	4	4	4	4	4	4	4	4	4	4	4	5	5	4	5	4	5	4	3	4	3	4	4	5	5	5	5	5	5	5	5	5	5	4	4	4	3	4	3	4	4	4	5	4	4	5	4	4
2	3	2	4	4	3	4	3	2	4	1	5	4	2	4	2	4	3	4	5	3	2	4	3	5	3	2	4	3	2	5	3	5	3	4	4	2	4	2	4	2	4	2	3	5	2	4	2	4	3
3	3	3	3	3	3	3	5	5	5	5	5	5	1	2	2	2	2	1	1	1	1	1	1	1	5	5	5	5	5	5	5	5	5	5	5	5	5	5	5	5	5	5	5	5	5	5	5	5	5
3	4	3	3	4	3	3	3	4	3	4	3	4	3	4	4	3	3	3	4	4	4	3	3	4	3	3	4	3	4	4	4	4	5	4	3	4	3	4	3	4	4	3	4	3	4	4	3	4	4
3	4	4	3	3	4	2	3	2	3	5	4	3	3	4	3	4	3	3	3	4	3	3	5	5	3	3	3	3	4	3	3	4	4	3	4	4	2	4	4	3	3	3	5	4	3	3	4	3	2
4	4	4	4	3	3	3	2	2	2	2	2	2	2	2	2	2	1	1	1	2	2	2	2	2	4	4	4	2	4	4	4	4	4	4	4	3	4	4	4	4	4	4	4	4	4	4	4	4	4
3	4	4	4	4	4	2	4	4	5	3	5	5	3	3	3	3	2	2	2	4	3	3	3	4	4	3	4	4	4	3	4	3	4	3	4	3	4	3	4	4	4	4	4	4	4	5	5	4	5
4	4	3	3	3	4	3	3	4	3	3	4	3	3	4	3	3	4	4	3	3	3	4	3	3	3	3	4	3	3	3	3	3	3	4	4	4	3	4	3	3	3	3	3	3	3	3	2	2	3
5	4	4	4	4	4	4	4	3	4	2	2	2	2	3	2	2	1	1	1	1	2	2	2	2	4	4	3	4	4	4	4	4	4	4	4	3	3	4	4	3	4	4	4	3	3	3	3	3	3
4	5	4	5	4	4	5	5	4	5	4	5	4	5	4	5	2	5	5	3	5	5	4	5	2	4	5	5	5	5	5	5	4	5	5	5	4	4	5	4	5	5	4	4	4	5	5	5	5	4
4	3	4	3	4	4	3	4	4	3	4	3	4	2	4	4	3	4	2	4	4	3	4	4	3	3	4	3	4	4	3	3	5	1	4	4	3	4	3	4	3	4	3	3	4	4	3	4	4	3
4	4	4	3	4	4	4	4	4	4	4	4	4	2	2	2	2	3	3	3	3	3	3	3	3	3	3	4	4	4	4	4	4	4	4	4	3	2	2	2	2	2	2	3	3	2	3	2	2	3
5	4	5	5	5	5	4	5	4	5	4	5	4	1	1	1	1	1	1	1	1	1	1	1	1	5	5	5	4	5	5	5	4	5	5	2	3	5	3	5	4	5	4	5	4	5	4	5	5	3
4	3	3	4	3	3	4	3	4	2	4	3	3	3	3	2	4	3	2	3	4	4	3	3	4	4	4	4	3	3	4	3	4	5	5	2	1	2	3	3	3	2	2	2	2	4	3	1	2	4
3	2	2	3	2	3	2	3	2	3	2	4	2	3	3	3	2	3	2	3	4	3	3	3	2	2	3	2	3	4	3	2	3	2	4	4	4	4	2	4	3	4	3	2	1	1	3	2	3	1
5	4	4	5	4	4	4	5	4	4	4	5	4	1	1	2	1	1	1	1	1	1	1	1	1	5	4	4	4	5	4	4	4	4	4	4	4	4	4	2	4	4	4	4	4	4	4	5	5	5
4	5	4	5	5	4	4	4	5	4	4	5	4	5	5	4	5	5	5	4	5	5	5	4	5	5	5	4	4	5	4	4	5	5	4	5	5	4	5	4	4	5	4	4	4	5	5	4	5	4
4	4	4	5	4	4	4	4	4	4	4	4	4	4	3	4	4	4	4	3	4	4	4	4	4	4	4	5	3	4	4	4	4	4	4	3	2	2	3	3	2	3	3	3	3	3	3	3	3	4
4	5	4	4	5	5	4	4	4	5	5	4	4	5	5	3	4	4	5	4	4	5	5	3	3	5	4	4	5	4	3	4	4	3	4	5	4	4	5	5	4	5	3	4	5	4	4	5	3	4
3	3	3	1	2	2	3	3	3	2	3	3	2	3	2	3	4	5	2	1	3	3	3	3	3	2	3	3	2	2	3	3	2	3	3	3	4	2	4	4	3	3	4	4	3	4	4	1	3	4
4	2	4	2	4	4	4	2	3	3	4	4	4	3	3	3	4	4	3	3	4	4	3	3	4	4	4	4	4	4	4	4	4	4	4	4	4	4	3	3	3	3	3	3	3	3	3	3	3	3
3	3	3	3	4	4	4	4	4	4	4	4	4	2	2	2	2	2	2	1	1	1	1	1	1	3	3	3	3	3	3	3	3	3	3	3	3	3	3	3	3	3	3	3	3	3	3	3	3	3
5	5	5	4	5	5	4	5	4	5	4	5	4	2	2	2	2	2	3	2	2	3	2	3	3	3	4	2	2	2	3	2	2	2	2	5	4	3	4	4	3	4	3	4	3	4	4	4	3	3
5	5	5	4	3	3	3	4	4	4	5	5	5	5	5	5	5	5	5	5	5	5	5	5	5	4	5	5	3	5	5	5	5	5	5	3	3	3	4	3	4	3	4	3	4	4	3	4	3	4
4	5	4	3	4	4	4	3	4	2	3	3	4	4	3	3	2	2	3	4	2	4	4	2	4	4	2	2	3	3	4	2	5	4	3	5	5	3	4	4	4	2	3	4	2	4	4	5	2	4
2	2	3	2	2	3	2	3	2	2	2	2	2	2	2	2	2	1	1	1	1	1	1	1	1	1	1	1	1	1	1	1	1	1	1	1	1	1	1	1	1	1	1	1	1	1	1	1	1	1
5	5	5	5	5	5	5	5	5	5	5	5	5	1	1	1	1	1	1	1	1	1	1	1	1	5	5	5	5	5	5	5	5	5	5	1	1	1	1	1	1	1	1	1	1	1	1	1	1	1
4	4	5	4	5	4	4	5	5	4	5	4	4	5	5	4	4	5	4	5	4	5	4	4	5	4	4	5	4	3	5	4	4	5	4	4	4	5	5	4	4	5	4	5	4	5	4	5	4	4
5	4	5	4	5	4	5	5	4	5	4	5	4	2	4	5	4	5	4	3	5	3	4	4	3	5	4	5	4	3	5	2	3	4	3	3	5	3	3	3	5	3	5	3	4	5	3	5	3	5
5	5	5	5	5	5	5	5	5	5	5	5	5	2	2	2	2	1	1	1	1	1	1	1	1	5	5	5	5	5	5	5	5	5	5	5	5	5	5	5	5	5	5	5	5	5	5	5	5	5
5	5	5	5	5	5	5	5	5	5	5	5	5	5	5	2	2	3	5	2	5	2	5	5	5	5	5	5	5	5	5	5	5	5	5	5	5	5	5	5	2	5	2	5	2	5	5	5	5	2
3	4	3	4	3	4	5	5	4	2	4	3	3	5	4	5	2	3	3	3	4	4	5	4	4	3	4	4	2	5	4	1	3	1	3	3	3	4	1	2	5	3	5	3	3	4	2	4	2	4
5	5	5	5	5	5	5	5	5	5	5	5	1	1	1	1	1	1	1	1	1	1	1	1	1	5	5	5	1	5	5	5	5	5	5	1	1	1	1	1	1	1	1	1	1	1	1	1	1	1
4	5	4	5	4	4	3	4	5	4	5	4	5	2	1	2	1	2	1	2	1	3	4	3	1	4	5	4	5	4	5	4	5	4	5	5	5	4	5	4	5	4	5	4	5	4	5	4	4	5
2	2	3	3	3	3	4	4	4	4	4	5	4	1	1	1	1	3	2	2	3	3	3	2	2	3	3	2	3	3	3	3	3	3	2	3	3	3	2	2	3	2	2	2	3	2	2	2	2	2
5	5	5	5	5	5	5	5	5	5	2	5	3	1	1	1	1	1	5	1	1	1	5	5	5	5	5	5	5	5	5	5	5	5	5	5	5	5	5	5	5	1	5	5	5	5	5	5	5	5
3	3	2	4	4	3	5	5	4	3	3	2	4	3	1	4	2	1	4	2	3	5	3	2	3	4	4	2	4	3	4	3	3	4	3	3	3	4	3	2	2	4	3	2	4	4	4	2	3	3
4	4	4	3	3	4	4	3	3	4	4	4	4	5	1	1	1	1	1	1	1	4	3	3	3	5	5	5	5	5	5	5	5	5	5	2	2	4	5	5	5	3	5	5	5	5	5	5	5	5
5	4	5	5	5	5	5	5	5	5	4	5	4	2	2	2	2	2	1	2	1	2	2	1	1	5	5	5	5	5	5	5	5	5	4	5	4	5	4	4	4	5	4	5	4	5	4	5	5	4
4	3	4	5	4	5	3	4	3	5	4	3	4	2	2	1	2	1	2	1	2	1	2	2	1	5	4	5	3	5	4	3	5	4	5	3	2	4	2	4	5	2	3	3	4	2	3	3	4	5
3	2	3	3	2	4	2	4	2	4	3	3	3	4	2	3	4	2	4	2	4	2	4	4	2	4	4	4	3	3	3	3	3	2	2	2	3	3	3	2	3	4	2	4	3	4	3	4	2	3
4	4	4	4	3	4	3	4	3	4	4	4	4	1	1	1	1	1	1	1	1	1	1	1	1	4	4	4	4	4	4	4	4	4	4	5	5	5	5	5	5	5	5	5	4	4	4	4	4	4
4	4	4	5	5	5	4	5	5	5	5	5	5	2	2	2	2	1	1	1	1	1	1	1	1	5	5	5	5	5	5	5	5	5	5	4	3	4	4	2	2	4	4	1	4	1	4	4	4	4
5	4	5	4	5	5	5	5	5	5	5	5	5	5	5	5	5	4	5	5	5	5	5	5	5	5	5	5	5	5	5	5	5	5	5	5	5	5	5	5	5	5	5	5	5	5	5	5	5	5
2	5	4	5	5	5	3	4	4	4	4	4	4	3	4	4	4	4	4	5	5	5	5	5	5	5	5	5	5	5	5	5	5	5	5	5	5	5	5	5	5	5	5	5	5	5	5	5	5	5
3	4	3	4	3	4	3	4	3	4	3	4	3	3	4	3	4	3	4	3	4	3	4	3	4	3	4	3	4	3	4	3	4	3	4	3	4	3	4	3	4	3	4	3	4	3	4	3	4	3
4	4	5	3	2	3	4	4	3	5	4	4	4	5	5	5	3	4	3	5	3	4	4	5	4	4	4	5	5	5	4	4	5	4	3	2	3	3	2	3	4	2	3	2	1	1	2	3	3	2
4	3	4	3	4	4	3	4	3	4	4	4	3	4	3	4	3	3	4	4	4	3	4	4	4	4	3	4	4	4	3	4	5	4	4	4	4	4	3	5	4	4	4	5	4	4	4	5	4	3
4	4	4	4	4	4	4	4	4	4	4	4	4	4	3	4	4	4	3	2	4	4	3	4	4	4	4	3	3	4	4	4	4	3	3	4	3	4	4	4	4	4	4	4	4	4	4	4	4	4
3	4	4	4	3	5	3	4	4	4	5	4	4	4	3	3	4	4	4	2	3	3	4	3	3	4	4	3	4	3	4	4	3	4	3	4	4	3	4	3	5	5	4	3	4	3	3	4	4	3
3	3	3	4	4	4	3	4	4	3	2	2	2	5	1	1	2	3	2	1	3	2	2	1	2	3	2	2	4	4	2	2	2	2	3	3	3	4	4	3	3	4	4	4	4	1	5	3	4	5
4	3	4	3	2	3	4	3	2	2	3	2	3	4	5	3	2	1	3	3	2	3	3	2	3	3	2	3	4	3	2	3	4	4	3	3	2	3	4	4	5	4	3	2	3	4	5	3	2	1
5	5	5	5	5	5	5	5	5	5	5	5	5	1	1	1	1	1	1	1	1	1	1	1	1	5	5	5	5	5	5	5	5	5	5	5	5	5	5	5	5	5	5	5	5	5	5	5	5	5
2	3	4	3	3	4	4	2	3	4	3	3	4	4	4	3	4	3	4	4	3	3	4	4	4	3	4	4	4	4	4	4	4	3	4	4	4	4	4	4	4	3	4	4	4	3	4	4	4	4
3	3	4	4	4	4	4	3	4	4	4	4	4	3	4	3	4	4	4	4	3	3	4	3	3	4	4	5	4	3	4	3	4	3	4	3	4	3	4	3	4	4	3	4	3	4	4	3	3	3
4	4	4	4	4	4	4	3	3	3	3	3	3	3	3	3	3	3	3	3	3	3	3	3	3	3	3	3	3	3	3	3	3	3	3	4	3	4	3	4	4	4	4	4	4	4	4	4	4	4
5	5	5	5	5	5	5	5	5	5	5	5	5	5	5	5	5	5	5	5	5	5	5	5	5	5	5	5	5	5	5	5	5	5	5	5	5	5	5	5	5	5	5	5	5	5	5	5	5	5
4	4	5	4	3	4	4	5	4	4	5	4	4	4	4	5	4	4	4	4	3	4	4	3	4	4	4	4	3	4	4	5	4	4	4	4	4	5	4	4	4	3	4	4	5	4	3	4	3	4
5	5	5	5	5	5	5	5	5	5	5	5	5	5	5	5	4	5	5	4	4	5	5	4	3	5	5	4	5	5	4	4	5	4	3	5	5	4	4	5	5	4	4	5	5	5	5	5	4	5
5	4	4	3	3	5	4	5	4	4	5	4	4	2	2	1	2	1	2	1	3	2	1	1	1	4	5	5	4	4	5	4	5	5	4	4	4	3	5	4	4	5	5	3	5	4	5	4	3	4
4	5	4	5	4	5	4	5	4	5	4	5	4	2	1	2	2	1	1	2	1	3	4	5	4	4	5	4	5	4	5	4	5	4	5	3	4	4	5	4	4	5	4	5	4	2	4	3	4	3
4	3	5	5	5	5	5	5	5	5	5	5	5	5	5	5	5	5	4	4	4	5	5	5	5	5	5	5	5	5	5	5	5	5	5	5	5	5	5	5	4	4	4	5	5	3	3	3	3	3
4	4	3	4	3	5	4	4	4	4	4	3	3	4	5	4	3	4	4	3	3	4	4	3	3	4	4	4	4	5	5	5	4	4	3	4	3	4	4	4	4	3	3	3	4	2	3	4	4	3
4	5	4	5	4	4	4	4	5	4	5	5	5	4	5	5	4	5	5	4	5	5	5	5	4	5	4	5	5	5	5	5	4	5	4	4	5	4	4	4	5	4	4	4	3	4	5	4	3	4
2	2	2	2	2	2	2	2	2	3	4	3	3	3	3	4	4	3	3	3	4	3	3	4	4	3	4	3	3	3	4	4	3	3	3	3	3	4	4	3	3	3	3	3	3	4	3	3	4	4
5	5	5	4	4	4	4	4	4	4	4	4	4	5	2	2	2	2	2	2	2	2	2	2	2	3	3	4	3	3	4	4	4	4	4	4	5	2	2	2	2	3	3	2	3	3	2	3	3	3
4	3	3	4	3	3	4	4	5	4	4	3	4	4	5	4	4	4	4	5	4	4	4	3	3	4	5	4	4	4	5	4	4	4	4	4	5	3	4	3	4	3	4	3	5	3	4	3	4	4
3	4	5	4	5	3	2	4	4	2	4	5	4	4	2	4	2	5	4	4	2	2	4	4	4	4	4	4	2	5	4	4	2	4	4	4	4	4	2	5	4	3	4	4	2	3	5	4	4	2
4	4	5	4	3	5	2	4	3	4	4	4	4	4	2	3	3	4	3	3	4	3	3	2	4	3	2	2	4	4	4	3	5	4	4	4	2	3	3	4	5	4	4	4	3	2	3	4	3	3
5	4	5	4	5	4	4	4	5	4	4	5	5	4	5	5	4	5	4	5	5	5	4	5	5	5	4	5	5	5	5	4	5	5	5	4	5	5	5	4	5	4	5	4	5	5	5	4	5	4
4	3	4	3	4	3	4	5	4	5	4	5	4	5	4	5	4	5	4	4	5	5	4	5	4	5	4	5	4	5	4	5	4	5	4	4	4	5	5	4	5	4	5	4	5	4	5	5	4	5
4	3	3	4	3	3	4	3	4	4	3	3	4	3	4	5	1	4	1	3	2	4	3	2	4	5	3	5	5	3	2	4	3	2	3	4	1	5	2	5	2	3	1	4	5	2	5	2	3	4
3	4	3	2	1	4	4	3	4	5	3	4	2	3	2	3	4	2	1	1	1	3	2	3	2	2	4	2	4	2	4	2	4	1	4	3	2	4	2	4	3	2	4	2	1	2	4	3	2	2
3	3	3	3	3	3	3	4	4	4	4	4	3	3	3	4	5	4	4	3	4	3	3	3	3	3	4	4	4	4	4	4	3	3	3	3	3	4	4	4	5	5	5	4	4	4	4	3	2	3
4	3	3	3	4	3	4	3	4	3	4	4	3	3	1	2	4	2	2	2	4	4	3	4	3	4	5	4	4	4	4	3	4	3	4	4	4	5	4	5	5	4	5	4	5	3	4	5	3	4
4	5	5	4	4	5	5	4	4	5	5	4	4	4	4	5	4	4	5	5	4	5	5	4	5	5	4	4	5	4	5	4	5	5	4	4	4	5	5	4	5	5	4	5	5	5	4	4	5	5
5	4	5	5	4	5	4	5	5	4	5	4	5	5	4	5	4	5	4	5	5	5	5	4	5	5	4	5	5	5	4	5	5	5	4	5	4	5	4	5	4	5	5	4	5	5	4	5	4	5
1	2	2	3	3	2	2	1	2	2	2	2	2	2	3	2	4	3	2	2	3	3	2	2	2	2	2	3	3	2	2	2	3	3	2	3	2	2	2	1	3	3	3	3	2	2	2	1	2	3
4	4	4	2	3	2	3	2	3	3	3	2	3	2	3	3	2	3	2	2	3	3	2	3	4	2	3	4	3	2	4	4	2	2	3	4	3	3	4	3	3	4	3	3	2	2	2	3	3	2
4	4	3	3	4	4	3	4	3	3	4	3	4	4	3	4	3	3	4	4	4	3	4	4	3	4	4	3	3	4	4	3	4	3	3	4	4	3	3	4	3	3	3	3	3	3	4	4	3	3
2	2	4	2	4	3	5	3	4	2	4	3	5	2	3	5	3	5	3	3	5	3	2	3	3	1	2	2	4	2	1	2	2	4	1	4	2	4	2	5	3	2	5	4	2	4	3	1	2	5
5	5	5	5	5	5	5	5	5	5	5	5	5	5	5	5	5	5	5	5	5	5	5	5	5	5	5	5	5	5	5	5	5	5	5	5	5	5	5	5	5	5	5	5	5	5	5	5	5	5
4	4	4	4	3	3	4	4	3	3	4	3	3	4	3	4	4	4	3	4	3	4	4	4	3	4	3	4	4	4	3	3	3	3	3	4	3	3	4	3	3	4	3	4	3	3	4	4	3	3
2	2	2	2	3	3	3	3	4	3	3	4	4	4	3	4	3	3	4	4	4	4	3	3	3	4	5	5	5	5	5	5	5	5	5	5	5	5	5	5	4	4	5	5	4	4	4	4	4	5
5	4	4	4	4	3	3	3	4	4	4	4	5	5	4	4	4	5	5	4	4	4	4	4	4	4	4	5	5	5	5	5	5	5	5	5	4	4	5	5	4	5	4	5	4	5	4	5	4	5
4	4	4	4	4	4	4	5	4	5	5	5	5	3	4	3	3	3	3	3	3	3	3	3	3	4	4	4	4	5	5	5	5	5	5	4	4	4	4	3	4	4	4	3	3	4	4	4	4	4
4	4	4	4	4	4	4	4	4	4	4	4	4	4	4	4	4	4	4	4	4	4	4	4	4	4	4	4	4	4	4	4	4	4	4	4	4	4	4	4	4	4	4	4	4	4	4	4	4	4
5	5	5	5	5	5	5	5	5	5	5	5	5	5	5	5	5	1	1	1	1	1	5	5	1	5	5	5	5	5	5	5	5	5	5	5	5	5	5	5	5	5	5	5	5	5	5	5	5	5
5	5	5	3	4	4	4	4	4	4	4	4	4	4	4	4	4	4	3	3	3	3	3	3	3	3	3	3	3	3	3	4	4	4	4	4	4	4	4	4	4	4	4	4	4	4	4	4	4	4
3	4	3	2	3	2	3	3	4	2	3	3	4	4	2	3	4	2	4	2	5	4	3	4	2	4	3	3	4	3	4	3	3	2	4	2	3	4	2	3	3	3	4	3	4	2	2	3	4	4
4	3	4	4	5	4	3	4	5	4	3	4	4	3	4	3	5	3	5	3	2	3	4	2	4	4	3	4	3	5	5	4	4	3	5	3	4	5	3	4	5	3	4	3	4	5	3	3	4	4
5	5	5	5	5	5	5	5	5	5	5	5	5	5	3	3	5	1	1	1	1	1	1	1	1	5	5	5	5	5	5	5	5	5	5	3	3	3	3	3	3	3	3	1	5	1	5	5	5	5
3	3	3	3	3	3	3	3	2	3	3	3	3	2	3	2	3	2	2	3	3	3	3	3	3	2	3	2	3	3	3	3	3	3	3	2	3	3	2	3	2	3	3	3	3	3	3	3	3	3
4	3	4	4	3	5	4	3	4	4	3	4	3	4	3	3	4	3	2	3	4	3	3	4	4	3	3	4	4	4	5	4	4	4	4	4	3	4	4	4	4	5	4	4	3	4	3	3	4	2
4	4	3	5	4	3	3	5	4	4	3	4	4	3	4	3	4	4	3	4	4	3	4	4	3	3	4	3	4	3	4	4	3	4	3	3	4	3	2	4	3	4	4	3	2	4	3	3	4	4
3	3	5	4	3	3	3	3	3	3	3	3	4	2	2	2	2	2	2	2	2	2	2	2	2	4	4	4	4	4	4	4	4	4	4	4	4	4	4	4	4	4	4	4	4	4	4	4	4	4
4	5	4	4	3	5	4	5	3	4	4	5	3	4	5	3	4	5	4	4	5	4	4	5	4	4	5	3	4	4	5	3	4	4	5	4	5	3	4	5	3	4	4	5	3	5	5	4	3	4
4	4	4	4	4	4	4	4	4	4	4	4	4	4	4	4	4	4	4	4	4	4	4	4	4	4	4	4	4	4	4	4	4	4	4	4	4	4	4	4	4	4	4	4	4	4	4	4	4	4
5	4	3	4	3	5	4	5	4	5	5	4	5	5	4	3	4	3	3	5	4	4	5	4	4	5	3	5	5	3	3	5	4	3	4	4	5	4	5	4	5	4	2	5	4	2	4	5	2	4
5	5	5	5	5	5	5	5	5	5	5	5	5	1	1	1	1	1	1	1	1	1	1	1	1	5	5	5	5	5	5	5	5	5	5	4	4	4	4	2	3	2	3	2	3	3	2	3	2	2
4	3	5	2	5	5	2	2	4	2	5	4	5	2	4	2	5	5	4	3	4	5	2	5	2	5	2	5	1	5	5	2	2	4	3	3	5	5	3	3	4	5	5	4	3	3	5	3	3	3
4	4	4	4	4	4	4	4	4	4	4	4	4	4	4	4	4	4	4	4	4	4	4	4	4	4	4	4	4	4	4	4	4	4	4	4	4	4	4	4	4	4	4	4	4	4	4	4	4	4
4	2	4	4	2	4	4	3	4	4	2	2	4	4	3	3	5	2	4	3	4	4	4	2	3	3	2	4	4	4	4	3	3	4	4	4	4	3	4	3	1	3	4	4	2	4	4	2	3	3
5	5	5	5	5	4	4	2	3	3	4	5	4	4	4	3	3	3	3	4	4	4	3	4	3	4	3	3	4	3	4	3	4	4	4	5	5	5	5	5	5	5	5	5	4	3	3	3	3	3
5	4	4	5	4	4	4	5	4	4	5	4	4	5	4	4	4	2	3	2	2	4	2	3	3	4	3	4	3	4	4	4	3	3	4	4	4	3	3	4	4	3	4	4	3	3	4	4	3	3
5	5	5	5	5	5	5	5	5	5	5	5	5	5	5	5	5	5	5	5	5	5	5	5	5	5	5	5	5	5	5	5	5	5	5	5	5	5	5	5	5	5	5	5	5	5	5	5	5	5
3	3	4	3	4	3	4	3	3	3	3	4	3	3	3	3	4	4	4	4	4	4	4	4	4	3	3	3	3	3	3	3	3	3	3	3	3	4	4	3	3	3	3	3	3	3	4	4	3	3
4	4	4	4	4	4	4	4	4	4	4	4	4	4	4	4	4	4	4	4	4	4	4	4	4	4	4	4	4	4	4	4	4	4	4	4	4	4	4	4	4	4	4	4	4	4	4	4	4	4
4	4	4	4	4	4	4	4	4	4	4	4	4	4	4	4	4	4	4	4	4	4	4	4	4	4	4	4	4	4	4	4	4	4	4	4	4	4	4	4	4	4	4	4	4	4	4	4	4	4
4	4	4	2	3	3	3	2	3	3	4	3	4	2	2	3	2	2	4	4	3	4	1	1	1	3	2	2	3	3	3	3	2	2	2	5	3	4	3	4	2	3	3	1	2	1	1	4	4	2
1	1	1	1	1	1	1	1	1	1	1	1	1	1	1	1	1	1	1	1	1	1	1	1	1	1	1	1	1	1	1	1	1	1	1	1	1	1	1	1	1	1	1	1	1	1	1	1	1	1
5	4	4	4	5	4	4	4	5	4	4	5	5	4	3	5	5	4	5	4	5	5	5	5	5	5	4	4	4	4	5	5	5	5	4	4	4	4	4	5	5	5	5	4	4	5	5	5	5	4
5	5	5	5	5	5	5	5	5	5	5	5	5	5	5	5	5	5	5	5	5	5	5	5	5	5	5	5	5	5	5	5	5	5	5	4	4	4	4	4	4	4	4	4	4	4	4	4	4	4
5	4	5	5	2	4	5	5	2	5	3	4	4	4	4	2	4	2	4	3	2	4	2	4	4	4	4	4	4	4	4	4	4	4	4	4	4	4	4	4	4	4	4	4	4	4	4	4	3	3
5	5	5	5	5	5	5	5	5	5	5	5	5	1	1	1	1	1	1	1	1	5	5	5	5	5	5	5	5	5	5	5	5	5	5	5	5	5	5	5	5	5	5	5	5	5	5	5	5	5
4	3	5	4	5	4	3	5	4	5	3	4	5	3	4	5	3	3	4	3	5	4	3	4	3	3	4	3	4	5	3	4	5	3	4	5	3	4	5	4	3	4	5	3	4	5	4	3	4	5
4	4	4	5	3	5	3	4	4	4	4	4	3	1	1	1	1	2	3	1	1	1	1	1	2	5	5	5	5	5	5	5	5	5	5	4	4	4	2	3	3	4	3	3	4	4	4	4	3	5
4	4	4	4	3	4	3	4	3	4	3	4	3	4	3	4	4	4	3	4	3	3	3	4	4	4	4	4	4	4	4	4	4	3	4	3	4	3	4	3	2	3	2	4	3	4	2	3	4	2
4	5	4	4	4	5	4	4	5	4	4	5	4	3	3	2	3	3	2	3	3	3	2	3	3	4	4	5	4	4	4	5	5	4	5	3	4	4	3	2	2	4	3	3	3	4	3	2	4	3
5	5	5	5	5	5	5	5	5	5	5	5	5	5	5	5	5	5	5	5	5	5	5	5	5	5	5	5	5	5	5	5	5	5	5	5	5	5	5	5	5	5	5	5	5	5	5	5	5	5
5	4	5	4	5	4	5	4	5	5	4	4	4	5	4	4	5	4	5	5	4	4	5	4	5	5	4	5	5	4	5	4	5	5	4	4	4	4	4	5	4	4	4	4	3	4	3	4	4	3
4	4	4	4	4	4	4	4	4	4	4	4	4	4	4	4	4	4	4	4	4	4	4	4	4	4	4	4	4	4	4	4	4	4	4	4	4	4	4	4	4	4	4	4	4	4	4	4	4	4
4	5	3	4	3	4	2	4	2	4	3	5	2	5	2	3	4	4	3	2	4	4	3	5	3	4	3	5	4	4	5	3	4	5	3	4	3	5	3	4	5	3	5	2	1	2	1	2	3	4
4	4	3	3	4	3	4	3	2	2	2	4	4	4	3	4	3	4	4	2	3	2	1	3	1	3	4	4	4	4	1	4	3	3	2	3	1	3	2	3	2	2	4	4	2	3	3	4	4	4
4	3	3	3	3	3	3	3	2	3	3	3	2	3	3	3	2	2	3	3	3	3	3	3	3	2	3	3	3	3	3	3	3	3	3	3	2	3	4	4	4	3	3	4	3	4	4	3	3	2
5	5	5	5	5	5	5	5	5	5	5	5	5	5	5	5	5	5	5	5	5	5	5	4	5	5	5	5	5	4	4	4	4	4	4	5	4	5	4	4	5	4	4	4	4	5	5	5	5	5
5	4	3	4	3	4	4	4	3	3	4	3	3	4	4	3	4	5	4	3	4	4	3	4	3	4	3	3	4	5	5	5	3	2	4	3	4	3	2	3	3	4	2	1	4	4	3	4	4	3
4	4	5	4	4	5	4	4	5	4	5	4	5	5	4	4	5	4	4	4	5	5	4	5	5	4	5	4	5	4	5	5	4	4	5	4	4	4	5	4	5	4	5	4	5	4	5	4	5	4
5	4	5	4	3	4	4	5	4	3	4	4	3	5	4	4	3	4	4	5	4	4	4	3	4	4	4	4	3	4	3	3	3	4	4	5	4	4	4	5	4	4	5	4	4	4	3	5	4	5
3	3	3	2	3	3	2	3	2	2	3	3	3	3	3	3	3	3	3	3	3	3	3	3	3	3	3	3	3	3	3	3	4	4	4	4	4	4	4	4	4	4	4	4	4	4	4	4	4	4
4	5	4	4	4	5	4	4	4	5	4	4	3	3	4	4	3	4	3	3	4	3	4	4	4	3	4	4	4	3	4	4	5	4	4	2	4	3	2	3	4	4	3	3	4	4	4	3	4	4
4	3	3	3	3	3	4	2	2	2	2	2	2	3	1	2	3	3	3	2	2	3	2	3	2	2	3	3	2	3	3	3	3	3	3	3	2	3	3	2	3	3	2	3	3	3	3	2	3	4
5	4	4	5	4	5	4	5	4	4	5	4	5	5	5	4	5	5	4	3	4	5	4	3	5	5	3	5	4	5	5	3	5	4	4	5	4	4	5	4	5	4	4	5	4	4	5	5	4	4
4	5	4	4	4	5	5	4	4	5	3	4	5	4	5	5	5	5	4	5	5	4	4	3	4	4	3	4	4	5	4	4	5	4	4	4	3	4	5	4	4	5	4	5	4	5	4	4	5	4
3	4	4	3	3	4	2	3	2	3	5	4	3	3	4	3	4	3	3	3	4	3	3	5	5	3	4	3	2	4	3	5	4	3	5	4	3	2	4	4	4	3	5	4	4	3	3	5	5	3
4	4	4	4	4	4	4	4	4	4	4	4	4	4	4	4	4	4	4	4	4	4	4	4	4	4	4	4	4	4	4	4	4	4	4	4	4	4	4	4	4	4	4	4	4	4	4	4	4	4
4	4	5	5	5	5	5	5	5	5	5	5	5	1	1	1	1	1	1	1	1	1	1	1	1	5	5	5	5	5	5	5	5	5	5	5	5	5	5	5	5	5	5	5	5	5	5	5	5	5
5	5	5	5	5	5	5	5	5	5	5	5	5	5	5	5	5	5	5	5	5	5	5	5	5	5	5	5	5	5	5	5	5	5	5	5	5	5	5	5	5	5	5	5	5	5	5	5	5	5
4	4	4	3	4	3	3	3	3	5	5	4	3	5	1	1	1	1	1	1	2	1	1	1	1	4	4	3	4	4	4	4	4	3	3	5	3	4	4	4	4	5	4	5	4	4	4	4	4	4
4	3	3	3	2	4	2	3	3	3	3	3	3	3	4	3	3	4	3	3	4	3	3	4	3	3	3	4	4	3	3	4	3	2	3	3	2	3	3	3	3	3	2	3	3	2	3	3	2	3
4	3	4	4	3	3	3	4	4	4	4	4	4	4	3	3	4	4	3	4	4	4	3	3	3	3	3	3	4	4	4	4	3	3	4	4	4	3	4	4	4	3	3	3	2	3	3	3	4	4
3	3	3	4	3	3	4	3	4	3	4	3	4	4	4	4	3	4	4	3	4	3	5	3	4	4	4	3	5	3	5	5	3	4	4	4	4	4	5	5	4	4	3	4	4	5	5	4	5	3
3	2	4	4	4	4	2	3	4	3	2	4	2	4	3	4	2	2	3	4	2	3	4	4	2	2	4	3	2	3	3	4	3	4	3	3	3	4	3	3	4	2	3	2	3	4	3	2	4	3
5	5	5	5	5	5	5	5	5	5	5	5	5	5	5	5	5	5	5	5	5	5	5	5	5	5	5	5	5	5	5	5	5	5	5	5	5	5	5	5	5	5	5	5	5	5	5	5	5	5
4	4	4	4	4	4	4	4	4	4	4	4	4	4	4	4	4	4	4	4	4	4	4	4	4	4	4	4	4	4	4	4	4	4	4	4	4	4	4	4	4	4	4	4	4	4	4	4	4	4
5	5	5	5	4	5	4	4	5	4	5	4	4	5	4	4	5	4	4	4	4	4	3	4	5	4	3	4	5	4	4	3	4	4	3	4	4	4	4	3	4	4	4	3	4	5	4	4	4	3
3	4	3	3	3	2	2	4	3	3	4	3	3	4	3	5	4	4	4	4	4	5	4	4	5	3	4	3	4	3	4	5	4	4	4	4	4	3	3	4	4	3	3	4	3	3	4	3	4	3
4	4	4	4	5	4	4	4	3	4	4	5	3	4	3	4	4	4	4	5	4	3	3	4	3	4	4	4	5	4	3	4	4	3	4	4	3	4	4	4	3	4	5	4	4	3	4	4	4	3
1	2	4	4	4	5	4	5	4	4	4	3	4	5	3	4	3	4	3	5	4	5	4	4	4	4	3	3	4	4	3	3	3	4	4	5	4	3	4	3	4	3	3	4	4	4	3	4	4	3
4	4	2	4	2	4	2	1	5	3	5	1	4	4	5	5	2	2	4	2	2	5	4	3	2	4	4	4	3	3	4	2	4	2	4	4	2	2	4	4	4	2	2	5	5	1	2	5	5	2
4	4	4	3	3	3	3	4	3	4	3	4	3	3	3	3	3	3	3	3	4	3	3	4	3	3	3	3	3	3	3	3	3	3	3	3	4	3	3	4	4	4	3	3	3	3	3	3	3	3
2	2	3	2	3	3	2	2	3	3	2	3	2	2	3	2	3	4	3	3	4	3	3	4	3	3	4	3	3	4	4	3	3	4	3	3	4	3	4	3	4	3	4	3	3	4	3	3	4	3
5	3	4	2	3	3	4	2	5	1	3	2	3	5	3	2	3	3	2	2	3	3	2	3	2	5	5	3	3	2	2	3	4	3	3	5	3	4	2	2	2	3	3	3	2	3	2	2	2	5
1	1	1	1	1	1	1	2	1	1	1	1	1	4	1	1	1	2	1	1	1	2	2	2	2	2	2	2	2	2	2	2	2	2	2	2	2	2	2	2	2	2	2	2	2	2	2	2	2	2
4	3	4	4	4	4	3	4	4	5	4	4	4	2	2	1	1	2	1	2	2	2	2	2	2	3	4	4	4	4	4	4	4	4	4	3	3	4	4	4	3	4	4	3	4	2	3	4	4	4
3	4	3	3	4	3	3	4	3	4	3	4	3	4	3	4	3	3	4	4	3	3	4	3	3	4	4	3	4	4	3	4	3	4	4	4	4	4	4	4	4	4	4	4	4	4	4	4	4	4
4	4	4	4	4	4	4	4	4	4	4	4	4	4	4	4	4	4	4	4	4	4	4	4	4	4	4	4	4	4	4	4	4	4	4	4	4	4	4	4	4	4	4	4	4	4	4	4	4	4
3	5	5	3	4	3	1	4	3	3	4	3	2	1	1	1	1	1	2	2	2	1	3	2	2	5	2	5	3	5	5	4	5	5	3	5	4	2	3	4	2	3	3	4	4	5	4	2	2	3
5	5	5	5	5	5	5	5	5	5	5	5	5	5	5	5	5	5	5	5	5	5	5	5	5	5	5	5	5	5	5	5	5	5	5	5	5	5	5	5	5	5	5	5	5	5	5	5	5	5
3	2	3	3	3	4	4	3	2	3	4	3	2	3	2	3	3	3	2	1	3	2	3	3	1	3	2	1	2	3	2	1	3	4	3	1	3	4	3	4	2	3	2	4	4	3	3	4	2	2
4	4	4	4	4	3	4	4	3	4	3	4	3	4	3	4	3	4	4	4	3	4	3	4	3	4	3	4	3	4	4	4	4	4	4	4	4	4	4	4	4	4	4	2	2	2	2	2	2	2
5	5	5	5	4	4	5	5	4	5	5	5	4	4	4	5	4	4	5	4	5	4	4	5	5	4	5	4	5	4	5	5	4	3	3	4	4	4	5	4	4	5	4	4	4	4	5	4	4	4
4	3	4	4	4	4	3	4	4	4	4	4	4	4	4	3	3	4	4	4	4	4	4	4	4	4	3	3	4	4	3	3	4	4	4	3	4	4	4	3	4	4	4	4	4	3	4	3	3	4
4	4	5	5	4	5	5	4	3	3	4	4	4	4	3	4	3	3	3	3	4	5	4	4	4	5	4	4	3	3	3	3	4	4	4	3	4	4	4	4	3	3	4	4	5	3	3	3	2	2
4	4	4	3	4	5	3	4	3	4	4	3	2	2	3	2	2	4	4	4	3	4	3	3	4	4	3	4	4	4	3	4	3	4	3	4	4	4	4	5	4	5	3	4	5	4	3	4	4	5
3	3	2	2	2	2	2	3	3	3	2	2	3	4	4	3	4	4	3	3	4	3	3	4	3	2	3	4	3	2	3	2	3	3	3	2	3	3	2	2	2	3	3	4	3	3	2	3	2	3
4	4	3	4	3	4	4	4	3	4	4	3	4	4	3	2	2	2	2	3	3	4	4	3	3	4	2	4	4	2	2	4	2	4	3	2	2	2	4	4	3	3	4	3	3	4	3	1	5	1
5	5	5	5	5	5	5	5	5	5	5	5	5	5	5	5	5	5	5	5	5	5	5	4	4	5	5	5	5	5	5	5	5	5	5	1	5	5	5	5	5	5	5	5	5	5	5	5	5	5
4	5	4	4	5	4	3	4	5	4	5	4	5	4	5	4	4	3	4	3	4	3	4	3	4	3	4	3	4	3	4	3	4	3	4	3	4	3	4	3	4	3	4	4	4	3	4	3	4	4
2	3	3	3	3	3	3	3	3	3	3	3	3	3	3	3	3	4	4	4	4	4	4	4	4	4	4	4	4	4	4	4	4	4	4	3	3	3	3	4	4	4	4	4	4	4	3	3	3	3
3	4	4	3	3	4	2	4	2	3	4	3	2	3	2	4	2	4	3	2	3	3	3	4	2	3	2	4	3	3	4	3	2	4	3	2	4	4	2	4	2	3	3	4	3	2	4	3	3	3
4	5	4	4	4	5	4	4	4	3	4	4	4	3	4	4	5	3	2	2	3	2	3	2	2	3	4	4	4	5	4	4	3	3	3	5	5	5	5	4	4	5	4	3	4	4	4	2	3	2
3	2	3	3	2	3	3	2	4	3	3	2	4	2	3	3	2	3	3	4	3	2	4	3	3	2	3	3	3	3	4	3	3	3	3	2	3	3	2	2	3	2	3	2	3	4	4	2	4	3
5	5	5	5	4	5	5	5	4	5	5	5	4	5	4	5	5	5	4	5	5	5	4	5	4	4	5	4	4	5	5	4	5	3	4	5	3	4	4	5	4	5	4	5	4	5	3	5	4	3
2	2	2	2	3	3	2	2	3	3	3	2	2	2	3	2	2	2	3	3	2	2	2	2	3	2	3	2	2	3	3	2	2	2	3	2	3	2	2	3	2	3	3	2	3	3	2	3	4	3
2	3	2	5	4	3	2	2	3	3	3	3	2	2	4	3	2	3	5	5	2	5	3	2	2	3	2	3	5	2	5	4	4	4	2	2	4	2	4	2	4	2	4	2	4	2	4	2	4	2
3	3	3	2	3	2	3	2	2	3	2	2	2	2	3	2	2	3	2	3	2	2	3	3	3	2	3	2	3	2	3	3	2	2	2	3	2	2	3	2	3	3	2	2	3	3	2	3	3	2
3	2	4	2	3	2	3	2	3	2	3	2	3	2	3	2	3	2	3	2	3	2	3	2	3	2	3	2	3	2	3	2	3	2	3	3	2	3	2	3	2	3	2	3	2	3	2	3	2	3
4	3	4	4	4	3	4	4	4	2	4	4	4	4	4	2	4	2	4	4	4	2	4	4	4	4	2	4	4	4	4	4	4	4	2	4	2	4	4	4	5	2	2	2	2	4	4	4	2	4
4	4	4	2	3	4	2	4	3	3	4	3	3	3	4	4	3	3	4	3	4	2	3	2	4	4	4	2	4	4	3	4	4	3	3	4	4	3	4	3	3	4	4	3	3	4	3	3	4	4
4	4	5	4	4	4	4	5	5	4	4	5	5	4	4	4	5	5	4	5	4	4	4	5	5	4	4	5	5	4	5	5	4	5	4	5	5	4	5	5	4	5	5	5	4	5	5	4	5	5
4	4	4	4	3	4	3	3	3	4	4	4	5	4	3	4	3	4	4	3	3	4	3	4	4	4	3	4	4	4	4	4	3	4	3	4	3	4	3	4	5	3	4	4	4	3	3	3	2	4
5	5	5	5	5	5	5	5	5	5	5	5	5	5	5	5	5	4	5	5	5	5	5	5	5	5	5	5	5	5	5	5	5	5	5	5	5	5	5	5	5	5	5	5	5	5	5	5	5	5
4	3	4	5	4	3	4	4	4	5	4	5	4	5	5	4	5	5	4	5	4	5	4	5	4	5	4	5	5	3	4	4	5	5	4	3	4	4	5	5	5	4	5	5	4	5	4	5	4	4
4	3	2	3	3	2	4	4	2	4	3	2	5	2	4	2	4	2	4	2	4	4	4	4	2	4	3	2	4	2	4	3	4	2	5	1	5	5	2	3	4	3	2	2	4	5	2	4	2	1
2	2	3	2	2	2	2	1	3	2	4	4	5	4	3	3	3	3	4	4	4	3	3	4	4	3	2	5	4	4	3	4	3	3	4	4	4	4	3	2	4	3	3	3	4	4	3	3	4	4
3	4	3	1	1	3	4	4	4	4	4	3	4	2	1	1	1	1	1	1	2	4	4	4	4	3	2	1	3	3	4	4	3	4	4	4	4	2	4	4	2	4	4	2	4	4	4	2	4	4
4	4	5	4	5	4	4	3	3	5	3	3	3	2	2	3	2	3	3	2	3	2	3	3	3	4	4	3	4	3	3	3	3	3	4	3	3	2	3	4	4	4	4	4	3	3	4	4	3	3
5	4	5	4	3	5	3	5	3	4	5	3	5	4	5	4	4	4	3	4	5	4	5	3	5	4	3	3	4	5	5	4	3	5	4	4	3	3	3	5	4	3	5	5	4	5	3	5	3	4
4	4	4	4	4	4	4	4	4	4	4	4	4	5	5	4	5	5	4	5	5	5	5	4	5	4	5	5	4	4	5	5	5	5	5	3	3	3	1	4	2	2	2	2	2	2	3	3	2	3
4	4	4	3	3	3	2	4	3	5	3	4	4	2	2	2	2	3	3	3	3	3	3	3	3	3	3	3	4	3	2	3	3	3	3	4	4	3	3	3	3	2	2	3	2	3	3	3	3	4
3	2	2	5	4	4	4	3	3	2	4	2	4	2	2	3	2	2	2	3	4	3	2	4	3	4	4	3	3	4	4	3	2	3	1	5	5	4	3	3	2	2	3	3	4	4	4	3	2	2
4	4	5	5	4	4	4	4	5	4	4	4	4	5	4	4	5	4	4	4	4	5	4	4	5	5	4	4	4	5	4	4	4	4	1	4	4	4	4	4	4	4	4	4	4	4	4	4	5	4
5	5	4	4	4	3	4	4	3	4	4	3	4	3	4	3	4	4	3	4	3	3	4	4	3	4	5	4	5	4	3	3	4	3	3	3	3	3	3	4	4	3	4	3	4	4	3	3	4	4
4	4	4	4	4	3	5	3	3	4	4	4	5	4	2	3	5	3	4	4	4	3	3	3	5	3	3	4	4	3	4	3	3	3	4	3	4	4	4	4	4	4	4	4	4	4	4	4	4	4
5	4	5	4	5	4	5	4	2	5	5	5	4	5	4	5	4	5	4	4	5	1	2	5	2	5	3	3	5	3	5	3	2	4	3	5	3	4	5	5	3	5	3	5	4	4	5	2	4	3
4	3	4	4	2	4	3	3	3	4	4	4	4	3	2	4	4	4	4	4	3	4	4	4	4	3	3	4	4	4	4	4	4	4	4	4	3	4	3	4	4	4	4	4	3	3	4	3	4	3
4	4	4	4	4	4	4	4	4	4	4	3	3	4	3	3	4	4	3	3	3	3	4	3	3	3	3	4	3	3	3	3	2	2	4	4	3	3	3	4	3	3	4	2	2	3	2	3	2	3
3	2	3	3	2	3	2	3	3	4	5	4	4	4	2	2	4	3	2	4	4	2	4	4	3	4	3	3	3	4	4	3	4	4	4	4	3	4	3	4	4	4	4	3	3	2	2	3	3	3
4	4	4	4	4	4	4	4	4	4	4	4	4	4	4	4	4	4	4	4	4	4	4	4	4	4	4	4	4	4	4	4	4	4	4	4	4	4	4	4	4	4	4	4	4	4	4	4	4	4
4	4	4	3	3	3	5	5	4	3	4	4	3	5	4	4	4	5	4	3	3	2	5	5	5	5	3	4	4	3	3	2	3	4	3	5	4	4	4	5	4	5	4	5	4	4	4	4	3	3
4	3	3	2	2	1	4	4	2	2	2	4	4	2	3	2	4	2	2	4	3	3	3	4	4	4	4	4	4	4	4	4	4	3	3	4	3	3	3	4	4	4	4	4	4	3	4	4	4	4
4	3	4	3	4	3	4	3	3	4	2	4	2	4	2	4	4	3	5	4	5	3	4	3	3	4	5	5	2	4	2	2	4	1	5	3	2	5	4	4	3	4	3	5	5	5	3	2	2	2
4	5	4	4	4	5	4	5	4	5	4	5	3	5	4	5	4	5	4	4	5	5	4	4	5	5	4	4	5	5	4	4	5	5	4	5	4	4	5	5	4	4	5	4	4	4	5	4	4	5
3	3	2	3	2	2	3	3	3	2	3	3	3	3	3	4	4	4	3	3	3	3	3	4	3	3	3	2	3	4	4	3	4	3	3	3	3	3	4	4	3	2	3	3	4	4	3	3	3	4
4	5	4	5	4	5	4	4	5	4	5	4	5	4	5	4	5	4	5	5	5	4	5	4	5	5	4	5	5	4	5	4	5	5	4	4	5	4	5	4	5	4	5	4	5	4	5	4	3	4
3	3	3	1	1	1	1	2	2	2	2	2	2	2	2	2	2	2	2	2	2	2	2	2	2	2	2	2	3	2	2	2	2	2	2	2	3	3	2	3	2	3	2	3	3	2	4	3	3	2
5	4	5	5	4	5	4	5	5	5	4	5	5	5	5	5	4	5	5	4	5	5	5	5	4	5	5	5	4	5	4	5	5	4	5	5	5	4	5	5	5	4	5	5	5	4	5	5	4	5
4	4	5	5	4	4	4	4	4	4	4	3	4	4	4	4	4	4	4	4	4	5	5	5	5	5	4	4	4	4	4	4	4	5	5	5	4	5	4	4	4	4	4	4	4	4	4	4	5	4
3	3	3	4	2	2	5	3	4	2	2	4	4	4	3	3	3	4	4	3	3	2	2	1	2	3	4	1	1	3	5	5	4	4	4	3	2	2	4	4	3	2	1	3	5	4	4	5	4	4
5	4	5	4	5	5	5	4	5	4	5	4	5	4	2	2	3	2	3	2	2	3	2	3	3	5	4	5	5	5	5	4	4	5	5	4	2	3	2	4	3	1	2	3	2	5	5	2	3	2
3	2	4	3	2	4	3	3	2	4	3	2	4	3	2	5	3	4	3	2	4	3	5	3	3	4	2	5	3	3	2	5	3	4	2	4	3	2	4	2	4	3	2	4	2	5	3	2	4	2
4	4	3	4	5	3	3	4	3	4	4	3	3	4	3	4	5	3	3	4	4	2	3	4	4	4	3	4	4	2	2	4	4	2	4	4	5	2	2	4	4	2	2	1	1	4	1	2	3	4
5	5	5	4	4	5	4	5	4	4	4	4	5	4	4	4	4	4	4	4	5	5	4	5	4	4	3	5	5	5	5	4	4	5	4	5	4	4	4	5	4	5	4	4	4	4	4	4	5	4
4	4	5	4	5	4	5	4	4	5	5	3	4	4	5	4	4	4	5	4	3	3	4	5	4	4	4	3	4	4	4	4	5	5	3	4	4	5	4	4	5	4	3	3	4	4	4	4	5	4
5	5	3	3	5	3	5	3	2	4	3	2	4	3	2	4	3	4	4	3	2	3	4	3	4	3	3	4	3	4	3	4	4	3	4	5	3	5	3	2	3	4	3	4	4	5	3	3	3	3
3	3	3	2	3	3	3	2	3	3	3	2	3	2	3	3	3	3	3	2	2	3	3	3	3	2	3	3	3	3	3	3	3	3	3	2	3	3	3	4	4	3	4	3	3	3	4	4	4	4
3	3	3	4	3	3	3	4	4	4	4	3	4	4	4	4	4	3	4	4	4	4	4	4	4	4	4	4	4	4	4	4	4	4	4	4	4	4	4	4	4	4	4	5	5	3	3	4	4	4
4	4	4	4	4	4	4	4	4	4	4	4	4	4	4	4	4	4	4	4	4	4	4	4	4	4	4	4	4	4	4	4	4	4	4	4	4	4	4	4	4	4	4	4	4	4	4	4	4	4
4	4	4	4	4	4	4	4	4	4	4	4	4	4	4	4	4	4	4	4	4	4	4	4	4	4	4	4	4	4	4	4	4	4	4	4	4	4	4	4	4	4	4	4	4	4	4	4	4	4
5	4	4	5	4	5	4	3	4	4	4	4	4	5	4	4	5	4	5	4	5	4	5	4	4	4	4	3	3	3	4	2	4	2	4	4	4	2	2	3	2	3	3	2	3	2	3	4	3	4
5	5	5	5	5	5	5	5	5	5	5	5	5	5	5	5	5	5	5	5	5	5	5	5	5	5	5	5	5	5	5	5	5	5	5	5	5	5	5	5	5	5	5	5	5	5	5	5	5	5
2	3	2	2	3	2	2	2	2	2	3	2	2	5	3	3	3	3	2	2	2	2	3	3	4	3	2	2	2	3	4	4	4	4	3	1	1	2	2	2	1	2	2	2	1	2	2	3	3	3
4	3	4	3	4	3	4	4	3	4	4	4	4	4	4	4	4	3	4	2	3	3	4	4	3	4	4	2	4	4	2	4	4	2	3	3	4	2	4	4	2	4	3	3	3	4	3	4	2	3
4	4	4	4	4	4	4	4	4	4	4	4	4	4	4	4	4	4	4	4	4	4	4	4	4	4	4	4	4	4	4	4	4	4	4	4	4	4	4	4	4	4	4	4	4	4	4	4	4	4
3	2	2	4	4	4	3	3	2	1	1	2	2	2	1	2	1	2	4	3	5	5	5	4	1	2	1	4	2	4	4	4	4	4	4	4	4	4	4	4	4	4	4	4	4	4	4	4	4	4
3	4	4	4	4	4	4	3	3	4	3	3	4	4	4	4	3	3	4	4	3	3	4	2	4	2	3	4	4	4	4	4	3	3	4	4	4	4	3	5	5	5	5	2	2	4	4	4	4	4
4	5	2	4	4	3	3	4	4	3	3	4	4	3	4	2	4	4	2	4	4	4	4	2	3	5	4	3	1	2	4	3	3	4	2	4	3	2	4	4	4	3	2	4	3	2	4	4	3	2
4	3	5	4	3	4	5	4	3	4	5	4	4	5	4	3	4	5	4	5	3	4	5	4	5	4	5	4	3	3	4	4	3	5	4	3	4	4	3	4	3	4	3	3	4	5	5	5	4	3
1	2	1	2	2	2	2	2	2	2	2	2	2	1	1	1	1	1	1	1	1	1	1	1	1	1	1	1	1	1	1	1	1	1	1	1	1	1	1	1	1	1	1	1	1	1	1	1	1	1
5	5	4	4	4	4	5	5	5	4	4	5	4	4	4	4	5	4	4	5	4	5	5	4	4	4	5	4	4	4	4	5	5	4	5	5	4	5	4	5	4	4	4	5	4	4	5	4	4	5
5	5	5	5	3	4	5	4	3	4	4	3	5	5	3	2	4	4	3	5	2	5	3	5	4	4	3	5	4	3	2	2	4	2	4	4	3	4	5	5	4	3	4	4	3	4	4	5	4	4
1	3	3	3	3	3	3	3	3	2	3	3	4	3	3	5	3	3	3	3	3	3	3	3	3	3	4	5	2	3	3	3	2	3	3	3	3	2	3	3	2	3	3	3	3	3	3	3	3	3
5	5	5	4	5	4	5	4	3	4	4	3	5	5	3	5	4	3	5	5	4	3	5	3	3	5	4	2	5	4	2	5	4	3	4	4	3	2	4	5	4	2	5	4	3	4	5	5	3	4
4	3	4	4	2	4	4	4	4	2	3	4	4	4	3	4	2	3	3	4	4	2	4	3	4	4	2	4	3	4	3	3	2	3	4	3	2	4	3	4	3	3	3	4	3	2	4	3	4	3
5	4	3	4	4	3	3	3	3	3	3	3	3	3	3	3	3	3	3	3	3	3	3	3	3	3	3	3	3	3	3	3	3	3	3	3	3	3	3	3	3	3	3	3	3	3	3	3	3	3
4	3	4	4	4	4	5	4	3	4	3	4	4	3	4	3	4	4	4	4	4	3	3	4	5	3	4	4	3	5	4	4	3	4	4	4	4	4	4	5	5	3	4	4	3	4	4	3	4	4
5	5	5	4	4	5	3	5	3	3	4	5	4	4	5	4	4	3	4	5	5	4	4	2	4	1	5	2	5	2	5	5	2	4	4	2	4	4	2	4	2	4	2	2	5	2	2	5	2	5
2	2	3	4	3	3	2	3	2	3	3	3	3	2	3	3	3	3	4	3	3	3	3	3	3	3	4	2	2	3	2	3	3	4	3	2	3	2	3	3	2	3	3	2	3	3	2	3	2	3
5	5	5	5	4	5	4	5	4	4	5	4	3	5	4	4	5	5	4	4	5	5	4	5	5	5	4	4	5	4	4	5	5	4	3	5	4	3	4	5	4	3	2	3	4	5	5	5	4	3
5	4	3	3	5	4	4	3	5	4	4	5	4	4	3	5	4	4	4	3	4	5	4	5	3	4	5	4	5	4	3	4	5	4	4	3	4	4	5	4	5	4	3	4	5	3	2	3	2	3
5	5	5	5	5	5	5	5	5	5	5	5	5	5	5	5	5	5	5	5	5	5	5	5	5	5	5	5	5	5	5	5	5	5	5	5	5	5	5	5	5	5	5	5	5	5	5	5	5	5
4	4	4	4	4	4	4	4	4	4	4	4	4	4	4	4	4	4	4	4	4	4	4	4	4	4	4	4	4	4	4	4	4	4	4	4	4	4	4	4	4	4	4	4	4	4	4	4	4	4
1	2	4	2	3	2	4	3	4	3	4	4	3	2	2	3	3	4	2	4	3	2	3	4	3	2	2	3	2	4	2	4	3	3	4	2	2	3	4	5	4	4	3	3	4	2	4	5	3	4
3	4	4	4	4	4	5	5	4	4	4	4	4	4	4	5	4	3	4	4	4	5	3	4	4	4	4	4	5	4	3	4	5	5	3	4	4	4	3	4	4	4	4	3	3	5	4	4	4	4
5	3	3	4	3	5	4	4	4	5	4	3	4	4	4	3	3	5	4	4	3	4	3	4	3	4	4	3	3	3	5	4	4	5	4	3	5	3	4	5	5	4	5	4	4	4	5	4	4	4
4	3	4	3	4	3	3	3	4	3	3	4	4	4	4	3	4	2	4	3	3	3	2	4	4	4	4	3	4	4	3	2	4	4	4	3	2	4	4	2	4	3	3	2	3	4	4	4	4	4
3	4	3	4	3	4	3	3	3	4	4	4	3	4	3	4	5	4	3	4	4	4	3	3	3	4	3	4	4	4	3	3	4	4	3	4	3	2	3	3	2	3	2	3	3	2	2	4	3	2
3	3	3	4	5	4	3	5	5	4	5	4	3	5	5	4	3	5	4	4	5	5	5	4	3	4	5	4	3	5	5	4	5	5	5	4	5	4	3	5	4	4	3	5	5	4	3	5	4	3
4	2	4	4	5	2	4	5	2	4	2	4	3	2	4	4	5	2	2	4	5	2	2	4	4	2	4	5	2	4	1	4	4	1	4	2	3	3	3	4	2	3	4	4	2	4	4	4	4	4
#NULL!	#NULL!	#NULL!	#NULL!	#NULL!	#NULL!	#NULL!	#NULL!	#NULL!	#NULL!	#NULL!	#NULL!	#NULL!	#NULL!	#NULL!	#NULL!	#NULL!	#NULL!	#NULL!	#NULL!	#NULL!	#NULL!	#NULL!	#NULL!	#NULL!	#NULL!	#NULL!	#NULL!	#NULL!	#NULL!	#NULL!	#NULL!	#NULL!	#NULL!	#NULL!	#NULL!	#NULL!	#NULL!	#NULL!	#NULL!	#NULL!	#NULL!	#NULL!	#NULL!	#NULL!	#NULL!	#NULL!	#NULL!	#NULL!	#NULL!
#NULL!	#NULL!	#NULL!	#NULL!	#NULL!	#NULL!	#NULL!	#NULL!	#NULL!	#NULL!	#NULL!	#NULL!	#NULL!	#NULL!	#NULL!	#NULL!	#NULL!	#NULL!	#NULL!	#NULL!	#NULL!	#NULL!	#NULL!	#NULL!	#NULL!	#NULL!	#NULL!	#NULL!	#NULL!	#NULL!	#NULL!	#NULL!	#NULL!	#NULL!	#NULL!	#NULL!	#NULL!	#NULL!	#NULL!	#NULL!	#NULL!	#NULL!	#NULL!	#NULL!	#NULL!	#NULL!	#NULL!	#NULL!	#NULL!	#NULL!
#NULL!	#NULL!	#NULL!	#NULL!	#NULL!	#NULL!	#NULL!	#NULL!	#NULL!	#NULL!	#NULL!	#NULL!	#NULL!	#NULL!	#NULL!	#NULL!	#NULL!	#NULL!	#NULL!	#NULL!	#NULL!	#NULL!	#NULL!	#NULL!	#NULL!	#NULL!	#NULL!	#NULL!	#NULL!	#NULL!	#NULL!	#NULL!	#NULL!	#NULL!	#NULL!	#NULL!	#NULL!	#NULL!	#NULL!	#NULL!	#NULL!	#NULL!	#NULL!	#NULL!	#NULL!	#NULL!	#NULL!	#NULL!	#NULL!	#NULL!
#NULL!	#NULL!	#NULL!	#NULL!	#NULL!	#NULL!	#NULL!	#NULL!	#NULL!	#NULL!	#NULL!	#NULL!	#NULL!	#NULL!	#NULL!	#NULL!	#NULL!	#NULL!	#NULL!	#NULL!	#NULL!	#NULL!	#NULL!	#NULL!	#NULL!	#NULL!	#NULL!	#NULL!	#NULL!	#NULL!	#NULL!	#NULL!	#NULL!	#NULL!	#NULL!	#NULL!	#NULL!	#NULL!	#NULL!	#NULL!	#NULL!	#NULL!	#NULL!	#NULL!	#NULL!	#NULL!	#NULL!	#NULL!	#NULL!	#NULL!
#NULL!	#NULL!	#NULL!	#NULL!	#NULL!	#NULL!	#NULL!	#NULL!	#NULL!	#NULL!	#NULL!	#NULL!	#NULL!	#NULL!	#NULL!	#NULL!	#NULL!	#NULL!	#NULL!	#NULL!	#NULL!	#NULL!	#NULL!	#NULL!	#NULL!	#NULL!	#NULL!	#NULL!	#NULL!	#NULL!	#NULL!	#NULL!	#NULL!	#NULL!	#NULL!	#NULL!	#NULL!	#NULL!	#NULL!	#NULL!	#NULL!	#NULL!	#NULL!	#NULL!	#NULL!	#NULL!	#NULL!	#NULL!	#NULL!	#NULL!
#NULL!	#NULL!	#NULL!	#NULL!	#NULL!	#NULL!	#NULL!	#NULL!	#NULL!	#NULL!	#NULL!	#NULL!	#NULL!	#NULL!	#NULL!	#NULL!	#NULL!	#NULL!	#NULL!	#NULL!	#NULL!	#NULL!	#NULL!	#NULL!	#NULL!	#NULL!	#NULL!	#NULL!	#NULL!	#NULL!	#NULL!	#NULL!	#NULL!	#NULL!	#NULL!	#NULL!	#NULL!	#NULL!	#NULL!	#NULL!	#NULL!	#NULL!	#NULL!	#NULL!	#NULL!	#NULL!	#NULL!	#NULL!	#NULL!	#NULL!
#NULL!	#NULL!	#NULL!	#NULL!	#NULL!	#NULL!	#NULL!	#NULL!	#NULL!	#NULL!	#NULL!	#NULL!	#NULL!	#NULL!	#NULL!	#NULL!	#NULL!	#NULL!	#NULL!	#NULL!	#NULL!	#NULL!	#NULL!	#NULL!	#NULL!	#NULL!	#NULL!	#NULL!	#NULL!	#NULL!	#NULL!	#NULL!	#NULL!	#NULL!	#NULL!	#NULL!	#NULL!	#NULL!	#NULL!	#NULL!	#NULL!	#NULL!	#NULL!	#NULL!	#NULL!	#NULL!	#NULL!	#NULL!	#NULL!	#NULL!
#NULL!	#NULL!	#NULL!	#NULL!	#NULL!	#NULL!	#NULL!	#NULL!	#NULL!	#NULL!	#NULL!	#NULL!	#NULL!	#NULL!	#NULL!	#NULL!	#NULL!	#NULL!	#NULL!	#NULL!	#NULL!	#NULL!	#NULL!	#NULL!	#NULL!	#NULL!	#NULL!	#NULL!	#NULL!	#NULL!	#NULL!	#NULL!	#NULL!	#NULL!	#NULL!	#NULL!	#NULL!	#NULL!	#NULL!	#NULL!	#NULL!	#NULL!	#NULL!	#NULL!	#NULL!	#NULL!	#NULL!	#NULL!	#NULL!	#NULL!
#NULL!	#NULL!	#NULL!	#NULL!	#NULL!	#NULL!	#NULL!	#NULL!	#NULL!	#NULL!	#NULL!	#NULL!	#NULL!	#NULL!	#NULL!	#NULL!	#NULL!	#NULL!	#NULL!	#NULL!	#NULL!	#NULL!	#NULL!	#NULL!	#NULL!	#NULL!	#NULL!	#NULL!	#NULL!	#NULL!	#NULL!	#NULL!	#NULL!	#NULL!	#NULL!	#NULL!	#NULL!	#NULL!	#NULL!	#NULL!	#NULL!	#NULL!	#NULL!	#NULL!	#NULL!	#NULL!	#NULL!	#NULL!	#NULL!	#NULL!
#NULL!	#NULL!	#NULL!	#NULL!	#NULL!	#NULL!	#NULL!	#NULL!	#NULL!	#NULL!	#NULL!	#NULL!	#NULL!	#NULL!	#NULL!	#NULL!	#NULL!	#NULL!	#NULL!	#NULL!	#NULL!	#NULL!	#NULL!	#NULL!	#NULL!	#NULL!	#NULL!	#NULL!	#NULL!	#NULL!	#NULL!	#NULL!	#NULL!	#NULL!	#NULL!	#NULL!	#NULL!	#NULL!	#NULL!	#NULL!	#NULL!	#NULL!	#NULL!	#NULL!	#NULL!	#NULL!	#NULL!	#NULL!	#NULL!	#NULL!
#NULL!	#NULL!	#NULL!	#NULL!	#NULL!	#NULL!	#NULL!	#NULL!	#NULL!	#NULL!	#NULL!	#NULL!	#NULL!	#NULL!	#NULL!	#NULL!	#NULL!	#NULL!	#NULL!	#NULL!	#NULL!	#NULL!	#NULL!	#NULL!	#NULL!	#NULL!	#NULL!	#NULL!	#NULL!	#NULL!	#NULL!	#NULL!	#NULL!	#NULL!	#NULL!	#NULL!	#NULL!	#NULL!	#NULL!	#NULL!	#NULL!	#NULL!	#NULL!	#NULL!	#NULL!	#NULL!	#NULL!	#NULL!	#NULL!	#NULL!
#NULL!	#NULL!	#NULL!	#NULL!	#NULL!	#NULL!	#NULL!	#NULL!	#NULL!	#NULL!	#NULL!	#NULL!	#NULL!	#NULL!	#NULL!	#NULL!	#NULL!	#NULL!	#NULL!	#NULL!	#NULL!	#NULL!	#NULL!	#NULL!	#NULL!	#NULL!	#NULL!	#NULL!	#NULL!	#NULL!	#NULL!	#NULL!	#NULL!	#NULL!	#NULL!	#NULL!	#NULL!	#NULL!	#NULL!	#NULL!	#NULL!	#NULL!	#NULL!	#NULL!	#NULL!	#NULL!	#NULL!	#NULL!	#NULL!	#NULL!
#NULL!	#NULL!	#NULL!	#NULL!	#NULL!	#NULL!	#NULL!	#NULL!	#NULL!	#NULL!	#NULL!	#NULL!	#NULL!	#NULL!	#NULL!	#NULL!	#NULL!	#NULL!	#NULL!	#NULL!	#NULL!	#NULL!	#NULL!	#NULL!	#NULL!	#NULL!	#NULL!	#NULL!	#NULL!	#NULL!	#NULL!	#NULL!	#NULL!	#NULL!	#NULL!	#NULL!	#NULL!	#NULL!	#NULL!	#NULL!	#NULL!	#NULL!	#NULL!	#NULL!	#NULL!	#NULL!	#NULL!	#NULL!	#NULL!	#NULL!
#NULL!	#NULL!	#NULL!	#NULL!	#NULL!	#NULL!	#NULL!	#NULL!	#NULL!	#NULL!	#NULL!	#NULL!	#NULL!	#NULL!	#NULL!	#NULL!	#NULL!	#NULL!	#NULL!	#NULL!	#NULL!	#NULL!	#NULL!	#NULL!	#NULL!	#NULL!	#NULL!	#NULL!	#NULL!	#NULL!	#NULL!	#NULL!	#NULL!	#NULL!	#NULL!	#NULL!	#NULL!	#NULL!	#NULL!	#NULL!	#NULL!	#NULL!	#NULL!	#NULL!	#NULL!	#NULL!	#NULL!	#NULL!	#NULL!	#NULL!
#NULL!	#NULL!	#NULL!	#NULL!	#NULL!	#NULL!	#NULL!	#NULL!	#NULL!	#NULL!	#NULL!	#NULL!	#NULL!	#NULL!	#NULL!	#NULL!	#NULL!	#NULL!	#NULL!	#NULL!	#NULL!	#NULL!	#NULL!	#NULL!	#NULL!	#NULL!	#NULL!	#NULL!	#NULL!	#NULL!	#NULL!	#NULL!	#NULL!	#NULL!	#NULL!	#NULL!	#NULL!	#NULL!	#NULL!	#NULL!	#NULL!	#NULL!	#NULL!	#NULL!	#NULL!	#NULL!	#NULL!	#NULL!	#NULL!	#NULL!
#NULL!	#NULL!	#NULL!	#NULL!	#NULL!	#NULL!	#NULL!	#NULL!	#NULL!	#NULL!	#NULL!	#NULL!	#NULL!	#NULL!	#NULL!	#NULL!	#NULL!	#NULL!	#NULL!	#NULL!	#NULL!	#NULL!	#NULL!	#NULL!	#NULL!	#NULL!	#NULL!	#NULL!	#NULL!	#NULL!	#NULL!	#NULL!	#NULL!	#NULL!	#NULL!	#NULL!	#NULL!	#NULL!	#NULL!	#NULL!	#NULL!	#NULL!	#NULL!	#NULL!	#NULL!	#NULL!	#NULL!	#NULL!	#NULL!	#NULL!
#NULL!	#NULL!	#NULL!	#NULL!	#NULL!	#NULL!	#NULL!	#NULL!	#NULL!	#NULL!	#NULL!	#NULL!	#NULL!	#NULL!	#NULL!	#NULL!	#NULL!	#NULL!	#NULL!	#NULL!	#NULL!	#NULL!	#NULL!	#NULL!	#NULL!	#NULL!	#NULL!	#NULL!	#NULL!	#NULL!	#NULL!	#NULL!	#NULL!	#NULL!	#NULL!	#NULL!	#NULL!	#NULL!	#NULL!	#NULL!	#NULL!	#NULL!	#NULL!	#NULL!	#NULL!	#NULL!	#NULL!	#NULL!	#NULL!	#NULL!
#NULL!	#NULL!	#NULL!	#NULL!	#NULL!	#NULL!	#NULL!	#NULL!	#NULL!	#NULL!	#NULL!	#NULL!	#NULL!	#NULL!	#NULL!	#NULL!	#NULL!	#NULL!	#NULL!	#NULL!	#NULL!	#NULL!	#NULL!	#NULL!	#NULL!	#NULL!	#NULL!	#NULL!	#NULL!	#NULL!	#NULL!	#NULL!	#NULL!	#NULL!	#NULL!	#NULL!	#NULL!	#NULL!	#NULL!	#NULL!	#NULL!	#NULL!	#NULL!	#NULL!	#NULL!	#NULL!	#NULL!	#NULL!	#NULL!	#NULL!
#NULL!	#NULL!	#NULL!	#NULL!	#NULL!	#NULL!	#NULL!	#NULL!	#NULL!	#NULL!	#NULL!	#NULL!	#NULL!	#NULL!	#NULL!	#NULL!	#NULL!	#NULL!	#NULL!	#NULL!	#NULL!	#NULL!	#NULL!	#NULL!	#NULL!	#NULL!	#NULL!	#NULL!	#NULL!	#NULL!	#NULL!	#NULL!	#NULL!	#NULL!	#NULL!	#NULL!	#NULL!	#NULL!	#NULL!	#NULL!	#NULL!	#NULL!	#NULL!	#NULL!	#NULL!	#NULL!	#NULL!	#NULL!	#NULL!	#NULL!
#NULL!	#NULL!	#NULL!	#NULL!	#NULL!	#NULL!	#NULL!	#NULL!	#NULL!	#NULL!	#NULL!	#NULL!	#NULL!	#NULL!	#NULL!	#NULL!	#NULL!	#NULL!	#NULL!	#NULL!	#NULL!	#NULL!	#NULL!	#NULL!	#NULL!	#NULL!	#NULL!	#NULL!	#NULL!	#NULL!	#NULL!	#NULL!	#NULL!	#NULL!	#NULL!	#NULL!	#NULL!	#NULL!	#NULL!	#NULL!	#NULL!	#NULL!	#NULL!	#NULL!	#NULL!	#NULL!	#NULL!	#NULL!	#NULL!	#NULL!
#NULL!	#NULL!	#NULL!	#NULL!	#NULL!	#NULL!	#NULL!	#NULL!	#NULL!	#NULL!	#NULL!	#NULL!	#NULL!	#NULL!	#NULL!	#NULL!	#NULL!	#NULL!	#NULL!	#NULL!	#NULL!	#NULL!	#NULL!	#NULL!	#NULL!	#NULL!	#NULL!	#NULL!	#NULL!	#NULL!	#NULL!	#NULL!	#NULL!	#NULL!	#NULL!	#NULL!	#NULL!	#NULL!	#NULL!	#NULL!	#NULL!	#NULL!	#NULL!	#NULL!	#NULL!	#NULL!	#NULL!	#NULL!	#NULL!	#NULL!
#NULL!	#NULL!	#NULL!	#NULL!	#NULL!	#NULL!	#NULL!	#NULL!	#NULL!	#NULL!	#NULL!	#NULL!	#NULL!	#NULL!	#NULL!	#NULL!	#NULL!	#NULL!	#NULL!	#NULL!	#NULL!	#NULL!	#NULL!	#NULL!	#NULL!	#NULL!	#NULL!	#NULL!	#NULL!	#NULL!	#NULL!	#NULL!	#NULL!	#NULL!	#NULL!	#NULL!	#NULL!	#NULL!	#NULL!	#NULL!	#NULL!	#NULL!	#NULL!	#NULL!	#NULL!	#NULL!	#NULL!	#NULL!	#NULL!	#NULL!
#NULL!	#NULL!	#NULL!	#NULL!	#NULL!	#NULL!	#NULL!	#NULL!	#NULL!	#NULL!	#NULL!	#NULL!	#NULL!	#NULL!	#NULL!	#NULL!	#NULL!	#NULL!	#NULL!	#NULL!	#NULL!	#NULL!	#NULL!	#NULL!	#NULL!	#NULL!	#NULL!	#NULL!	#NULL!	#NULL!	#NULL!	#NULL!	#NULL!	#NULL!	#NULL!	#NULL!	#NULL!	#NULL!	#NULL!	#NULL!	#NULL!	#NULL!	#NULL!	#NULL!	#NULL!	#NULL!	#NULL!	#NULL!	#NULL!	#NULL!
#NULL!	#NULL!	#NULL!	#NULL!	#NULL!	#NULL!	#NULL!	#NULL!	#NULL!	#NULL!	#NULL!	#NULL!	#NULL!	#NULL!	#NULL!	#NULL!	#NULL!	#NULL!	#NULL!	#NULL!	#NULL!	#NULL!	#NULL!	#NULL!	#NULL!	#NULL!	#NULL!	#NULL!	#NULL!	#NULL!	#NULL!	#NULL!	#NULL!	#NULL!	#NULL!	#NULL!	#NULL!	#NULL!	#NULL!	#NULL!	#NULL!	#NULL!	#NULL!	#NULL!	#NULL!	#NULL!	#NULL!	#NULL!	#NULL!	#NULL!
#NULL!	#NULL!	#NULL!	#NULL!	#NULL!	#NULL!	#NULL!	#NULL!	#NULL!	#NULL!	#NULL!	#NULL!	#NULL!	#NULL!	#NULL!	#NULL!	#NULL!	#NULL!	#NULL!	#NULL!	#NULL!	#NULL!	#NULL!	#NULL!	#NULL!	#NULL!	#NULL!	#NULL!	#NULL!	#NULL!	#NULL!	#NULL!	#NULL!	#NULL!	#NULL!	#NULL!	#NULL!	#NULL!	#NULL!	#NULL!	#NULL!	#NULL!	#NULL!	#NULL!	#NULL!	#NULL!	#NULL!	#NULL!	#NULL!	#NULL!
#NULL!	#NULL!	#NULL!	#NULL!	#NULL!	#NULL!	#NULL!	#NULL!	#NULL!	#NULL!	#NULL!	#NULL!	#NULL!	#NULL!	#NULL!	#NULL!	#NULL!	#NULL!	#NULL!	#NULL!	#NULL!	#NULL!	#NULL!	#NULL!	#NULL!	#NULL!	#NULL!	#NULL!	#NULL!	#NULL!	#NULL!	#NULL!	#NULL!	#NULL!	#NULL!	#NULL!	#NULL!	#NULL!	#NULL!	#NULL!	#NULL!	#NULL!	#NULL!	#NULL!	#NULL!	#NULL!	#NULL!	#NULL!	#NULL!	#NULL!
#NULL!	#NULL!	#NULL!	#NULL!	#NULL!	#NULL!	#NULL!	#NULL!	#NULL!	#NULL!	#NULL!	#NULL!	#NULL!	#NULL!	#NULL!	#NULL!	#NULL!	#NULL!	#NULL!	#NULL!	#NULL!	#NULL!	#NULL!	#NULL!	#NULL!	#NULL!	#NULL!	#NULL!	#NULL!	#NULL!	#NULL!	#NULL!	#NULL!	#NULL!	#NULL!	#NULL!	#NULL!	#NULL!	#NULL!	#NULL!	#NULL!	#NULL!	#NULL!	#NULL!	#NULL!	#NULL!	#NULL!	#NULL!	#NULL!	#NULL!
#NULL!	#NULL!	#NULL!	#NULL!	#NULL!	#NULL!	#NULL!	#NULL!	#NULL!	#NULL!	#NULL!	#NULL!	#NULL!	#NULL!	#NULL!	#NULL!	#NULL!	#NULL!	#NULL!	#NULL!	#NULL!	#NULL!	#NULL!	#NULL!	#NULL!	#NULL!	#NULL!	#NULL!	#NULL!	#NULL!	#NULL!	#NULL!	#NULL!	#NULL!	#NULL!	#NULL!	#NULL!	#NULL!	#NULL!	#NULL!	#NULL!	#NULL!	#NULL!	#NULL!	#NULL!	#NULL!	#NULL!	#NULL!	#NULL!	#NULL!
#NULL!	#NULL!	#NULL!	#NULL!	#NULL!	#NULL!	#NULL!	#NULL!	#NULL!	#NULL!	#NULL!	#NULL!	#NULL!	#NULL!	#NULL!	#NULL!	#NULL!	#NULL!	#NULL!	#NULL!	#NULL!	#NULL!	#NULL!	#NULL!	#NULL!	#NULL!	#NULL!	#NULL!	#NULL!	#NULL!	#NULL!	#NULL!	#NULL!	#NULL!	#NULL!	#NULL!	#NULL!	#NULL!	#NULL!	#NULL!	#NULL!	#NULL!	#NULL!	#NULL!	#NULL!	#NULL!	#NULL!	#NULL!	#NULL!	#NULL!
#NULL!	#NULL!	#NULL!	#NULL!	#NULL!	#NULL!	#NULL!	#NULL!	#NULL!	#NULL!	#NULL!	#NULL!	#NULL!	#NULL!	#NULL!	#NULL!	#NULL!	#NULL!	#NULL!	#NULL!	#NULL!	#NULL!	#NULL!	#NULL!	#NULL!	#NULL!	#NULL!	#NULL!	#NULL!	#NULL!	#NULL!	#NULL!	#NULL!	#NULL!	#NULL!	#NULL!	#NULL!	#NULL!	#NULL!	#NULL!	#NULL!	#NULL!	#NULL!	#NULL!	#NULL!	#NULL!	#NULL!	#NULL!	#NULL!	#NULL!
#NULL!	#NULL!	#NULL!	#NULL!	#NULL!	#NULL!	#NULL!	#NULL!	#NULL!	#NULL!	#NULL!	#NULL!	#NULL!	#NULL!	#NULL!	#NULL!	#NULL!	#NULL!	#NULL!	#NULL!	#NULL!	#NULL!	#NULL!	#NULL!	#NULL!	#NULL!	#NULL!	#NULL!	#NULL!	#NULL!	#NULL!	#NULL!	#NULL!	#NULL!	#NULL!	#NULL!	#NULL!	#NULL!	#NULL!	#NULL!	#NULL!	#NULL!	#NULL!	#NULL!	#NULL!	#NULL!	#NULL!	#NULL!	#NULL!	#NULL!
#NULL!	#NULL!	#NULL!	#NULL!	#NULL!	#NULL!	#NULL!	#NULL!	#NULL!	#NULL!	#NULL!	#NULL!	#NULL!	#NULL!	#NULL!	#NULL!	#NULL!	#NULL!	#NULL!	#NULL!	#NULL!	#NULL!	#NULL!	#NULL!	#NULL!	#NULL!	#NULL!	#NULL!	#NULL!	#NULL!	#NULL!	#NULL!	#NULL!	#NULL!	#NULL!	#NULL!	#NULL!	#NULL!	#NULL!	#NULL!	#NULL!	#NULL!	#NULL!	#NULL!	#NULL!	#NULL!	#NULL!	#NULL!	#NULL!	#NULL!
#NULL!	#NULL!	#NULL!	#NULL!	#NULL!	#NULL!	#NULL!	#NULL!	#NULL!	#NULL!	#NULL!	#NULL!	#NULL!	#NULL!	#NULL!	#NULL!	#NULL!	#NULL!	#NULL!	#NULL!	#NULL!	#NULL!	#NULL!	#NULL!	#NULL!	#NULL!	#NULL!	#NULL!	#NULL!	#NULL!	#NULL!	#NULL!	#NULL!	#NULL!	#NULL!	#NULL!	#NULL!	#NULL!	#NULL!	#NULL!	#NULL!	#NULL!	#NULL!	#NULL!	#NULL!	#NULL!	#NULL!	#NULL!	#NULL!	#NULL!
#NULL!	#NULL!	#NULL!	#NULL!	#NULL!	#NULL!	#NULL!	#NULL!	#NULL!	#NULL!	#NULL!	#NULL!	#NULL!	#NULL!	#NULL!	#NULL!	#NULL!	#NULL!	#NULL!	#NULL!	#NULL!	#NULL!	#NULL!	#NULL!	#NULL!	#NULL!	#NULL!	#NULL!	#NULL!	#NULL!	#NULL!	#NULL!	#NULL!	#NULL!	#NULL!	#NULL!	#NULL!	#NULL!	#NULL!	#NULL!	#NULL!	#NULL!	#NULL!	#NULL!	#NULL!	#NULL!	#NULL!	#NULL!	#NULL!	#NULL!
#NULL!	#NULL!	#NULL!	#NULL!	#NULL!	#NULL!	#NULL!	#NULL!	#NULL!	#NULL!	#NULL!	#NULL!	#NULL!	#NULL!	#NULL!	#NULL!	#NULL!	#NULL!	#NULL!	#NULL!	#NULL!	#NULL!	#NULL!	#NULL!	#NULL!	#NULL!	#NULL!	#NULL!	#NULL!	#NULL!	#NULL!	#NULL!	#NULL!	#NULL!	#NULL!	#NULL!	#NULL!	#NULL!	#NULL!	#NULL!	#NULL!	#NULL!	#NULL!	#NULL!	#NULL!	#NULL!	#NULL!	#NULL!	#NULL!	#NULL!
#NULL!	#NULL!	#NULL!	#NULL!	#NULL!	#NULL!	#NULL!	#NULL!	#NULL!	#NULL!	#NULL!	#NULL!	#NULL!	#NULL!	#NULL!	#NULL!	#NULL!	#NULL!	#NULL!	#NULL!	#NULL!	#NULL!	#NULL!	#NULL!	#NULL!	#NULL!	#NULL!	#NULL!	#NULL!	#NULL!	#NULL!	#NULL!	#NULL!	#NULL!	#NULL!	#NULL!	#NULL!	#NULL!	#NULL!	#NULL!	#NULL!	#NULL!	#NULL!	#NULL!	#NULL!	#NULL!	#NULL!	#NULL!	#NULL!	#NULL!
#NULL!	#NULL!	#NULL!	#NULL!	#NULL!	#NULL!	#NULL!	#NULL!	#NULL!	#NULL!	#NULL!	#NULL!	#NULL!	#NULL!	#NULL!	#NULL!	#NULL!	#NULL!	#NULL!	#NULL!	#NULL!	#NULL!	#NULL!	#NULL!	#NULL!	#NULL!	#NULL!	#NULL!	#NULL!	#NULL!	#NULL!	#NULL!	#NULL!	#NULL!	#NULL!	#NULL!	#NULL!	#NULL!	#NULL!	#NULL!	#NULL!	#NULL!	#NULL!	#NULL!	#NULL!	#NULL!	#NULL!	#NULL!	#NULL!	#NULL!
#NULL!	#NULL!	#NULL!	#NULL!	#NULL!	#NULL!	#NULL!	#NULL!	#NULL!	#NULL!	#NULL!	#NULL!	#NULL!	#NULL!	#NULL!	#NULL!	#NULL!	#NULL!	#NULL!	#NULL!	#NULL!	#NULL!	#NULL!	#NULL!	#NULL!	#NULL!	#NULL!	#NULL!	#NULL!	#NULL!	#NULL!	#NULL!	#NULL!	#NULL!	#NULL!	#NULL!	#NULL!	#NULL!	#NULL!	#NULL!	#NULL!	#NULL!	#NULL!	#NULL!	#NULL!	#NULL!	#NULL!	#NULL!	#NULL!	#NULL!
#NULL!	#NULL!	#NULL!	#NULL!	#NULL!	#NULL!	#NULL!	#NULL!	#NULL!	#NULL!	#NULL!	#NULL!	#NULL!	#NULL!	#NULL!	#NULL!	#NULL!	#NULL!	#NULL!	#NULL!	#NULL!	#NULL!	#NULL!	#NULL!	#NULL!	#NULL!	#NULL!	#NULL!	#NULL!	#NULL!	#NULL!	#NULL!	#NULL!	#NULL!	#NULL!	#NULL!	#NULL!	#NULL!	#NULL!	#NULL!	#NULL!	#NULL!	#NULL!	#NULL!	#NULL!	#NULL!	#NULL!	#NULL!	#NULL!	#NULL!
#NULL!	#NULL!	#NULL!	#NULL!	#NULL!	#NULL!	#NULL!	#NULL!	#NULL!	#NULL!	#NULL!	#NULL!	#NULL!	#NULL!	#NULL!	#NULL!	#NULL!	#NULL!	#NULL!	#NULL!	#NULL!	#NULL!	#NULL!	#NULL!	#NULL!	#NULL!	#NULL!	#NULL!	#NULL!	#NULL!	#NULL!	#NULL!	#NULL!	#NULL!	#NULL!	#NULL!	#NULL!	#NULL!	#NULL!	#NULL!	#NULL!	#NULL!	#NULL!	#NULL!	#NULL!	#NULL!	#NULL!	#NULL!	#NULL!	#NULL!
#NULL!	#NULL!	#NULL!	#NULL!	#NULL!	#NULL!	#NULL!	#NULL!	#NULL!	#NULL!	#NULL!	#NULL!	#NULL!	#NULL!	#NULL!	#NULL!	#NULL!	#NULL!	#NULL!	#NULL!	#NULL!	#NULL!	#NULL!	#NULL!	#NULL!	#NULL!	#NULL!	#NULL!	#NULL!	#NULL!	#NULL!	#NULL!	#NULL!	#NULL!	#NULL!	#NULL!	#NULL!	#NULL!	#NULL!	#NULL!	#NULL!	#NULL!	#NULL!	#NULL!	#NULL!	#NULL!	#NULL!	#NULL!	#NULL!	#NULL!
#NULL!	#NULL!	#NULL!	#NULL!	#NULL!	#NULL!	#NULL!	#NULL!	#NULL!	#NULL!	#NULL!	#NULL!	#NULL!	#NULL!	#NULL!	#NULL!	#NULL!	#NULL!	#NULL!	#NULL!	#NULL!	#NULL!	#NULL!	#NULL!	#NULL!	#NULL!	#NULL!	#NULL!	#NULL!	#NULL!	#NULL!	#NULL!	#NULL!	#NULL!	#NULL!	#NULL!	#NULL!	#NULL!	#NULL!	#NULL!	#NULL!	#NULL!	#NULL!	#NULL!	#NULL!	#NULL!	#NULL!	#NULL!	#NULL!	#NULL!
#NULL!	#NULL!	#NULL!	#NULL!	#NULL!	#NULL!	#NULL!	#NULL!	#NULL!	#NULL!	#NULL!	#NULL!	#NULL!	#NULL!	#NULL!	#NULL!	#NULL!	#NULL!	#NULL!	#NULL!	#NULL!	#NULL!	#NULL!	#NULL!	#NULL!	#NULL!	#NULL!	#NULL!	#NULL!	#NULL!	#NULL!	#NULL!	#NULL!	#NULL!	#NULL!	#NULL!	#NULL!	#NULL!	#NULL!	#NULL!	#NULL!	#NULL!	#NULL!	#NULL!	#NULL!	#NULL!	#NULL!	#NULL!	#NULL!	#NULL!
#NULL!	#NULL!	#NULL!	#NULL!	#NULL!	#NULL!	#NULL!	#NULL!	#NULL!	#NULL!	#NULL!	#NULL!	#NULL!	#NULL!	#NULL!	#NULL!	#NULL!	#NULL!	#NULL!	#NULL!	#NULL!	#NULL!	#NULL!	#NULL!	#NULL!	#NULL!	#NULL!	#NULL!	#NULL!	#NULL!	#NULL!	#NULL!	#NULL!	#NULL!	#NULL!	#NULL!	#NULL!	#NULL!	#NULL!	#NULL!	#NULL!	#NULL!	#NULL!	#NULL!	#NULL!	#NULL!	#NULL!	#NULL!	#NULL!	#NULL!
#NULL!	#NULL!	#NULL!	#NULL!	#NULL!	#NULL!	#NULL!	#NULL!	#NULL!	#NULL!	#NULL!	#NULL!	#NULL!	#NULL!	#NULL!	#NULL!	#NULL!	#NULL!	#NULL!	#NULL!	#NULL!	#NULL!	#NULL!	#NULL!	#NULL!	#NULL!	#NULL!	#NULL!	#NULL!	#NULL!	#NULL!	#NULL!	#NULL!	#NULL!	#NULL!	#NULL!	#NULL!	#NULL!	#NULL!	#NULL!	#NULL!	#NULL!	#NULL!	#NULL!	#NULL!	#NULL!	#NULL!	#NULL!	#NULL!	#NULL!
#NULL!	#NULL!	#NULL!	#NULL!	#NULL!	#NULL!	#NULL!	#NULL!	#NULL!	#NULL!	#NULL!	#NULL!	#NULL!	#NULL!	#NULL!	#NULL!	#NULL!	#NULL!	#NULL!	#NULL!	#NULL!	#NULL!	#NULL!	#NULL!	#NULL!	#NULL!	#NULL!	#NULL!	#NULL!	#NULL!	#NULL!	#NULL!	#NULL!	#NULL!	#NULL!	#NULL!	#NULL!	#NULL!	#NULL!	#NULL!	#NULL!	#NULL!	#NULL!	#NULL!	#NULL!	#NULL!	#NULL!	#NULL!	#NULL!	#NULL!
#NULL!	#NULL!	#NULL!	#NULL!	#NULL!	#NULL!	#NULL!	#NULL!	#NULL!	#NULL!	#NULL!	#NULL!	#NULL!	#NULL!	#NULL!	#NULL!	#NULL!	#NULL!	#NULL!	#NULL!	#NULL!	#NULL!	#NULL!	#NULL!	#NULL!	#NULL!	#NULL!	#NULL!	#NULL!	#NULL!	#NULL!	#NULL!	#NULL!	#NULL!	#NULL!	#NULL!	#NULL!	#NULL!	#NULL!	#NULL!	#NULL!	#NULL!	#NULL!	#NULL!	#NULL!	#NULL!	#NULL!	#NULL!	#NULL!	#NULL!
#NULL!	#NULL!	#NULL!	#NULL!	#NULL!	#NULL!	#NULL!	#NULL!	#NULL!	#NULL!	#NULL!	#NULL!	#NULL!	#NULL!	#NULL!	#NULL!	#NULL!	#NULL!	#NULL!	#NULL!	#NULL!	#NULL!	#NULL!	#NULL!	#NULL!	#NULL!	#NULL!	#NULL!	#NULL!	#NULL!	#NULL!	#NULL!	#NULL!	#NULL!	#NULL!	#NULL!	#NULL!	#NULL!	#NULL!	#NULL!	#NULL!	#NULL!	#NULL!	#NULL!	#NULL!	#NULL!	#NULL!	#NULL!	#NULL!	#NULL!
#NULL!	#NULL!	#NULL!	#NULL!	#NULL!	#NULL!	#NULL!	#NULL!	#NULL!	#NULL!	#NULL!	#NULL!	#NULL!	#NULL!	#NULL!	#NULL!	#NULL!	#NULL!	#NULL!	#NULL!	#NULL!	#NULL!	#NULL!	#NULL!	#NULL!	#NULL!	#NULL!	#NULL!	#NULL!	#NULL!	#NULL!	#NULL!	#NULL!	#NULL!	#NULL!	#NULL!	#NULL!	#NULL!	#NULL!	#NULL!	#NULL!	#NULL!	#NULL!	#NULL!	#NULL!	#NULL!	#NULL!	#NULL!	#NULL!	#NULL!
#NULL!	#NULL!	#NULL!	#NULL!	#NULL!	#NULL!	#NULL!	#NULL!	#NULL!	#NULL!	#NULL!	#NULL!	#NULL!	#NULL!	#NULL!	#NULL!	#NULL!	#NULL!	#NULL!	#NULL!	#NULL!	#NULL!	#NULL!	#NULL!	#NULL!	#NULL!	#NULL!	#NULL!	#NULL!	#NULL!	#NULL!	#NULL!	#NULL!	#NULL!	#NULL!	#NULL!	#NULL!	#NULL!	#NULL!	#NULL!	#NULL!	#NULL!	#NULL!	#NULL!	#NULL!	#NULL!	#NULL!	#NULL!	#NULL!	#NULL!
#NULL!	#NULL!	#NULL!	#NULL!	#NULL!	#NULL!	#NULL!	#NULL!	#NULL!	#NULL!	#NULL!	#NULL!	#NULL!	#NULL!	#NULL!	#NULL!	#NULL!	#NULL!	#NULL!	#NULL!	#NULL!	#NULL!	#NULL!	#NULL!	#NULL!	#NULL!	#NULL!	#NULL!	#NULL!	#NULL!	#NULL!	#NULL!	#NULL!	#NULL!	#NULL!	#NULL!	#NULL!	#NULL!	#NULL!	#NULL!	#NULL!	#NULL!	#NULL!	#NULL!	#NULL!	#NULL!	#NULL!	#NULL!	#NULL!	#NULL!
#NULL!	#NULL!	#NULL!	#NULL!	#NULL!	#NULL!	#NULL!	#NULL!	#NULL!	#NULL!	#NULL!	#NULL!	#NULL!	#NULL!	#NULL!	#NULL!	#NULL!	#NULL!	#NULL!	#NULL!	#NULL!	#NULL!	#NULL!	#NULL!	#NULL!	#NULL!	#NULL!	#NULL!	#NULL!	#NULL!	#NULL!	#NULL!	#NULL!	#NULL!	#NULL!	#NULL!	#NULL!	#NULL!	#NULL!	#NULL!	#NULL!	#NULL!	#NULL!	#NULL!	#NULL!	#NULL!	#NULL!	#NULL!	#NULL!	#NULL!
#NULL!	#NULL!	#NULL!	#NULL!	#NULL!	#NULL!	#NULL!	#NULL!	#NULL!	#NULL!	#NULL!	#NULL!	#NULL!	#NULL!	#NULL!	#NULL!	#NULL!	#NULL!	#NULL!	#NULL!	#NULL!	#NULL!	#NULL!	#NULL!	#NULL!	#NULL!	#NULL!	#NULL!	#NULL!	#NULL!	#NULL!	#NULL!	#NULL!	#NULL!	#NULL!	#NULL!	#NULL!	#NULL!	#NULL!	#NULL!	#NULL!	#NULL!	#NULL!	#NULL!	#NULL!	#NULL!	#NULL!	#NULL!	#NULL!	#NULL!
#NULL!	#NULL!	#NULL!	#NULL!	#NULL!	#NULL!	#NULL!	#NULL!	#NULL!	#NULL!	#NULL!	#NULL!	#NULL!	#NULL!	#NULL!	#NULL!	#NULL!	#NULL!	#NULL!	#NULL!	#NULL!	#NULL!	#NULL!	#NULL!	#NULL!	#NULL!	#NULL!	#NULL!	#NULL!	#NULL!	#NULL!	#NULL!	#NULL!	#NULL!	#NULL!	#NULL!	#NULL!	#NULL!	#NULL!	#NULL!	#NULL!	#NULL!	#NULL!	#NULL!	#NULL!	#NULL!	#NULL!	#NULL!	#NULL!	#NULL!
#NULL!	#NULL!	#NULL!	#NULL!	#NULL!	#NULL!	#NULL!	#NULL!	#NULL!	#NULL!	#NULL!	#NULL!	#NULL!	#NULL!	#NULL!	#NULL!	#NULL!	#NULL!	#NULL!	#NULL!	#NULL!	#NULL!	#NULL!	#NULL!	#NULL!	#NULL!	#NULL!	#NULL!	#NULL!	#NULL!	#NULL!	#NULL!	#NULL!	#NULL!	#NULL!	#NULL!	#NULL!	#NULL!	#NULL!	#NULL!	#NULL!	#NULL!	#NULL!	#NULL!	#NULL!	#NULL!	#NULL!	#NULL!	#NULL!	#NULL!
#NULL!	#NULL!	#NULL!	#NULL!	#NULL!	#NULL!	#NULL!	#NULL!	#NULL!	#NULL!	#NULL!	#NULL!	#NULL!	#NULL!	#NULL!	#NULL!	#NULL!	#NULL!	#NULL!	#NULL!	#NULL!	#NULL!	#NULL!	#NULL!	#NULL!	#NULL!	#NULL!	#NULL!	#NULL!	#NULL!	#NULL!	#NULL!	#NULL!	#NULL!	#NULL!	#NULL!	#NULL!	#NULL!	#NULL!	#NULL!	#NULL!	#NULL!	#NULL!	#NULL!	#NULL!	#NULL!	#NULL!	#NULL!	#NULL!	#NULL!
#NULL!	#NULL!	#NULL!	#NULL!	#NULL!	#NULL!	#NULL!	#NULL!	#NULL!	#NULL!	#NULL!	#NULL!	#NULL!	#NULL!	#NULL!	#NULL!	#NULL!	#NULL!	#NULL!	#NULL!	#NULL!	#NULL!	#NULL!	#NULL!	#NULL!	#NULL!	#NULL!	#NULL!	#NULL!	#NULL!	#NULL!	#NULL!	#NULL!	#NULL!	#NULL!	#NULL!	#NULL!	#NULL!	#NULL!	#NULL!	#NULL!	#NULL!	#NULL!	#NULL!	#NULL!	#NULL!	#NULL!	#NULL!	#NULL!	#NULL!
#NULL!	#NULL!	#NULL!	#NULL!	#NULL!	#NULL!	#NULL!	#NULL!	#NULL!	#NULL!	#NULL!	#NULL!	#NULL!	#NULL!	#NULL!	#NULL!	#NULL!	#NULL!	#NULL!	#NULL!	#NULL!	#NULL!	#NULL!	#NULL!	#NULL!	#NULL!	#NULL!	#NULL!	#NULL!	#NULL!	#NULL!	#NULL!	#NULL!	#NULL!	#NULL!	#NULL!	#NULL!	#NULL!	#NULL!	#NULL!	#NULL!	#NULL!	#NULL!	#NULL!	#NULL!	#NULL!	#NULL!	#NULL!	#NULL!	#NULL!
#NULL!	#NULL!	#NULL!	#NULL!	#NULL!	#NULL!	#NULL!	#NULL!	#NULL!	#NULL!	#NULL!	#NULL!	#NULL!	#NULL!	#NULL!	#NULL!	#NULL!	#NULL!	#NULL!	#NULL!	#NULL!	#NULL!	#NULL!	#NULL!	#NULL!	#NULL!	#NULL!	#NULL!	#NULL!	#NULL!	#NULL!	#NULL!	#NULL!	#NULL!	#NULL!	#NULL!	#NULL!	#NULL!	#NULL!	#NULL!	#NULL!	#NULL!	#NULL!	#NULL!	#NULL!	#NULL!	#NULL!	#NULL!	#NULL!	#NULL!
#NULL!	#NULL!	#NULL!	#NULL!	#NULL!	#NULL!	#NULL!	#NULL!	#NULL!	#NULL!	#NULL!	#NULL!	#NULL!	#NULL!	#NULL!	#NULL!	#NULL!	#NULL!	#NULL!	#NULL!	#NULL!	#NULL!	#NULL!	#NULL!	#NULL!	#NULL!	#NULL!	#NULL!	#NULL!	#NULL!	#NULL!	#NULL!	#NULL!	#NULL!	#NULL!	#NULL!	#NULL!	#NULL!	#NULL!	#NULL!	#NULL!	#NULL!	#NULL!	#NULL!	#NULL!	#NULL!	#NULL!	#NULL!	#NULL!	#NULL!
#NULL!	#NULL!	#NULL!	#NULL!	#NULL!	#NULL!	#NULL!	#NULL!	#NULL!	#NULL!	#NULL!	#NULL!	#NULL!	#NULL!	#NULL!	#NULL!	#NULL!	#NULL!	#NULL!	#NULL!	#NULL!	#NULL!	#NULL!	#NULL!	#NULL!	#NULL!	#NULL!	#NULL!	#NULL!	#NULL!	#NULL!	#NULL!	#NULL!	#NULL!	#NULL!	#NULL!	#NULL!	#NULL!	#NULL!	#NULL!	#NULL!	#NULL!	#NULL!	#NULL!	#NULL!	#NULL!	#NULL!	#NULL!	#NULL!	#NULL!
#NULL!	#NULL!	#NULL!	#NULL!	#NULL!	#NULL!	#NULL!	#NULL!	#NULL!	#NULL!	#NULL!	#NULL!	#NULL!	#NULL!	#NULL!	#NULL!	#NULL!	#NULL!	#NULL!	#NULL!	#NULL!	#NULL!	#NULL!	#NULL!	#NULL!	#NULL!	#NULL!	#NULL!	#NULL!	#NULL!	#NULL!	#NULL!	#NULL!	#NULL!	#NULL!	#NULL!	#NULL!	#NULL!	#NULL!	#NULL!	#NULL!	#NULL!	#NULL!	#NULL!	#NULL!	#NULL!	#NULL!	#NULL!	#NULL!	#NULL!
#NULL!	#NULL!	#NULL!	#NULL!	#NULL!	#NULL!	#NULL!	#NULL!	#NULL!	#NULL!	#NULL!	#NULL!	#NULL!	#NULL!	#NULL!	#NULL!	#NULL!	#NULL!	#NULL!	#NULL!	#NULL!	#NULL!	#NULL!	#NULL!	#NULL!	#NULL!	#NULL!	#NULL!	#NULL!	#NULL!	#NULL!	#NULL!	#NULL!	#NULL!	#NULL!	#NULL!	#NULL!	#NULL!	#NULL!	#NULL!	#NULL!	#NULL!	#NULL!	#NULL!	#NULL!	#NULL!	#NULL!	#NULL!	#NULL!	#NULL!
#NULL!	#NULL!	#NULL!	#NULL!	#NULL!	#NULL!	#NULL!	#NULL!	#NULL!	#NULL!	#NULL!	#NULL!	#NULL!	#NULL!	#NULL!	#NULL!	#NULL!	#NULL!	#NULL!	#NULL!	#NULL!	#NULL!	#NULL!	#NULL!	#NULL!	#NULL!	#NULL!	#NULL!	#NULL!	#NULL!	#NULL!	#NULL!	#NULL!	#NULL!	#NULL!	#NULL!	#NULL!	#NULL!	#NULL!	#NULL!	#NULL!	#NULL!	#NULL!	#NULL!	#NULL!	#NULL!	#NULL!	#NULL!	#NULL!	#NULL!
#NULL!	#NULL!	#NULL!	#NULL!	#NULL!	#NULL!	#NULL!	#NULL!	#NULL!	#NULL!	#NULL!	#NULL!	#NULL!	#NULL!	#NULL!	#NULL!	#NULL!	#NULL!	#NULL!	#NULL!	#NULL!	#NULL!	#NULL!	#NULL!	#NULL!	#NULL!	#NULL!	#NULL!	#NULL!	#NULL!	#NULL!	#NULL!	#NULL!	#NULL!	#NULL!	#NULL!	#NULL!	#NULL!	#NULL!	#NULL!	#NULL!	#NULL!	#NULL!	#NULL!	#NULL!	#NULL!	#NULL!	#NULL!	#NULL!	#NULL!
#NULL!	#NULL!	#NULL!	#NULL!	#NULL!	#NULL!	#NULL!	#NULL!	#NULL!	#NULL!	#NULL!	#NULL!	#NULL!	#NULL!	#NULL!	#NULL!	#NULL!	#NULL!	#NULL!	#NULL!	#NULL!	#NULL!	#NULL!	#NULL!	#NULL!	#NULL!	#NULL!	#NULL!	#NULL!	#NULL!	#NULL!	#NULL!	#NULL!	#NULL!	#NULL!	#NULL!	#NULL!	#NULL!	#NULL!	#NULL!	#NULL!	#NULL!	#NULL!	#NULL!	#NULL!	#NULL!	#NULL!	#NULL!	#NULL!	#NULL!
#NULL!	#NULL!	#NULL!	#NULL!	#NULL!	#NULL!	#NULL!	#NULL!	#NULL!	#NULL!	#NULL!	#NULL!	#NULL!	#NULL!	#NULL!	#NULL!	#NULL!	#NULL!	#NULL!	#NULL!	#NULL!	#NULL!	#NULL!	#NULL!	#NULL!	#NULL!	#NULL!	#NULL!	#NULL!	#NULL!	#NULL!	#NULL!	#NULL!	#NULL!	#NULL!	#NULL!	#NULL!	#NULL!	#NULL!	#NULL!	#NULL!	#NULL!	#NULL!	#NULL!	#NULL!	#NULL!	#NULL!	#NULL!	#NULL!	#NULL!
#NULL!	#NULL!	#NULL!	#NULL!	#NULL!	#NULL!	#NULL!	#NULL!	#NULL!	#NULL!	#NULL!	#NULL!	#NULL!	#NULL!	#NULL!	#NULL!	#NULL!	#NULL!	#NULL!	#NULL!	#NULL!	#NULL!	#NULL!	#NULL!	#NULL!	#NULL!	#NULL!	#NULL!	#NULL!	#NULL!	#NULL!	#NULL!	#NULL!	#NULL!	#NULL!	#NULL!	#NULL!	#NULL!	#NULL!	#NULL!	#NULL!	#NULL!	#NULL!	#NULL!	#NULL!	#NULL!	#NULL!	#NULL!	#NULL!	#NULL!
#NULL!	#NULL!	#NULL!	#NULL!	#NULL!	#NULL!	#NULL!	#NULL!	#NULL!	#NULL!	#NULL!	#NULL!	#NULL!	#NULL!	#NULL!	#NULL!	#NULL!	#NULL!	#NULL!	#NULL!	#NULL!	#NULL!	#NULL!	#NULL!	#NULL!	#NULL!	#NULL!	#NULL!	#NULL!	#NULL!	#NULL!	#NULL!	#NULL!	#NULL!	#NULL!	#NULL!	#NULL!	#NULL!	#NULL!	#NULL!	#NULL!	#NULL!	#NULL!	#NULL!	#NULL!	#NULL!	#NULL!	#NULL!	#NULL!	#NULL!
#NULL!	#NULL!	#NULL!	#NULL!	#NULL!	#NULL!	#NULL!	#NULL!	#NULL!	#NULL!	#NULL!	#NULL!	#NULL!	#NULL!	#NULL!	#NULL!	#NULL!	#NULL!	#NULL!	#NULL!	#NULL!	#NULL!	#NULL!	#NULL!	#NULL!	#NULL!	#NULL!	#NULL!	#NULL!	#NULL!	#NULL!	#NULL!	#NULL!	#NULL!	#NULL!	#NULL!	#NULL!	#NULL!	#NULL!	#NULL!	#NULL!	#NULL!	#NULL!	#NULL!	#NULL!	#NULL!	#NULL!	#NULL!	#NULL!	#NULL!
#NULL!	#NULL!	#NULL!	#NULL!	#NULL!	#NULL!	#NULL!	#NULL!	#NULL!	#NULL!	#NULL!	#NULL!	#NULL!	#NULL!	#NULL!	#NULL!	#NULL!	#NULL!	#NULL!	#NULL!	#NULL!	#NULL!	#NULL!	#NULL!	#NULL!	#NULL!	#NULL!	#NULL!	#NULL!	#NULL!	#NULL!	#NULL!	#NULL!	#NULL!	#NULL!	#NULL!	#NULL!	#NULL!	#NULL!	#NULL!	#NULL!	#NULL!	#NULL!	#NULL!	#NULL!	#NULL!	#NULL!	#NULL!	#NULL!	#NULL!
#NULL!	#NULL!	#NULL!	#NULL!	#NULL!	#NULL!	#NULL!	#NULL!	#NULL!	#NULL!	#NULL!	#NULL!	#NULL!	#NULL!	#NULL!	#NULL!	#NULL!	#NULL!	#NULL!	#NULL!	#NULL!	#NULL!	#NULL!	#NULL!	#NULL!	#NULL!	#NULL!	#NULL!	#NULL!	#NULL!	#NULL!	#NULL!	#NULL!	#NULL!	#NULL!	#NULL!	#NULL!	#NULL!	#NULL!	#NULL!	#NULL!	#NULL!	#NULL!	#NULL!	#NULL!	#NULL!	#NULL!	#NULL!	#NULL!	#NULL!
#NULL!	#NULL!	#NULL!	#NULL!	#NULL!	#NULL!	#NULL!	#NULL!	#NULL!	#NULL!	#NULL!	#NULL!	#NULL!	#NULL!	#NULL!	#NULL!	#NULL!	#NULL!	#NULL!	#NULL!	#NULL!	#NULL!	#NULL!	#NULL!	#NULL!	#NULL!	#NULL!	#NULL!	#NULL!	#NULL!	#NULL!	#NULL!	#NULL!	#NULL!	#NULL!	#NULL!	#NULL!	#NULL!	#NULL!	#NULL!	#NULL!	#NULL!	#NULL!	#NULL!	#NULL!	#NULL!	#NULL!	#NULL!	#NULL!	#NULL!
#NULL!	#NULL!	#NULL!	#NULL!	#NULL!	#NULL!	#NULL!	#NULL!	#NULL!	#NULL!	#NULL!	#NULL!	#NULL!	#NULL!	#NULL!	#NULL!	#NULL!	#NULL!	#NULL!	#NULL!	#NULL!	#NULL!	#NULL!	#NULL!	#NULL!	#NULL!	#NULL!	#NULL!	#NULL!	#NULL!	#NULL!	#NULL!	#NULL!	#NULL!	#NULL!	#NULL!	#NULL!	#NULL!	#NULL!	#NULL!	#NULL!	#NULL!	#NULL!	#NULL!	#NULL!	#NULL!	#NULL!	#NULL!	#NULL!	#NULL!
#NULL!	#NULL!	#NULL!	#NULL!	#NULL!	#NULL!	#NULL!	#NULL!	#NULL!	#NULL!	#NULL!	#NULL!	#NULL!	#NULL!	#NULL!	#NULL!	#NULL!	#NULL!	#NULL!	#NULL!	#NULL!	#NULL!	#NULL!	#NULL!	#NULL!	#NULL!	#NULL!	#NULL!	#NULL!	#NULL!	#NULL!	#NULL!	#NULL!	#NULL!	#NULL!	#NULL!	#NULL!	#NULL!	#NULL!	#NULL!	#NULL!	#NULL!	#NULL!	#NULL!	#NULL!	#NULL!	#NULL!	#NULL!	#NULL!	#NULL!
#NULL!	#NULL!	#NULL!	#NULL!	#NULL!	#NULL!	#NULL!	#NULL!	#NULL!	#NULL!	#NULL!	#NULL!	#NULL!	#NULL!	#NULL!	#NULL!	#NULL!	#NULL!	#NULL!	#NULL!	#NULL!	#NULL!	#NULL!	#NULL!	#NULL!	#NULL!	#NULL!	#NULL!	#NULL!	#NULL!	#NULL!	#NULL!	#NULL!	#NULL!	#NULL!	#NULL!	#NULL!	#NULL!	#NULL!	#NULL!	#NULL!	#NULL!	#NULL!	#NULL!	#NULL!	#NULL!	#NULL!	#NULL!	#NULL!	#NULL!
#NULL!	#NULL!	#NULL!	#NULL!	#NULL!	#NULL!	#NULL!	#NULL!	#NULL!	#NULL!	#NULL!	#NULL!	#NULL!	#NULL!	#NULL!	#NULL!	#NULL!	#NULL!	#NULL!	#NULL!	#NULL!	#NULL!	#NULL!	#NULL!	#NULL!	#NULL!	#NULL!	#NULL!	#NULL!	#NULL!	#NULL!	#NULL!	#NULL!	#NULL!	#NULL!	#NULL!	#NULL!	#NULL!	#NULL!	#NULL!	#NULL!	#NULL!	#NULL!	#NULL!	#NULL!	#NULL!	#NULL!	#NULL!	#NULL!	#NULL!
#NULL!	#NULL!	#NULL!	#NULL!	#NULL!	#NULL!	#NULL!	#NULL!	#NULL!	#NULL!	#NULL!	#NULL!	#NULL!	#NULL!	#NULL!	#NULL!	#NULL!	#NULL!	#NULL!	#NULL!	#NULL!	#NULL!	#NULL!	#NULL!	#NULL!	#NULL!	#NULL!	#NULL!	#NULL!	#NULL!	#NULL!	#NULL!	#NULL!	#NULL!	#NULL!	#NULL!	#NULL!	#NULL!	#NULL!	#NULL!	#NULL!	#NULL!	#NULL!	#NULL!	#NULL!	#NULL!	#NULL!	#NULL!	#NULL!	#NULL!
#NULL!	#NULL!	#NULL!	#NULL!	#NULL!	#NULL!	#NULL!	#NULL!	#NULL!	#NULL!	#NULL!	#NULL!	#NULL!	#NULL!	#NULL!	#NULL!	#NULL!	#NULL!	#NULL!	#NULL!	#NULL!	#NULL!	#NULL!	#NULL!	#NULL!	#NULL!	#NULL!	#NULL!	#NULL!	#NULL!	#NULL!	#NULL!	#NULL!	#NULL!	#NULL!	#NULL!	#NULL!	#NULL!	#NULL!	#NULL!	#NULL!	#NULL!	#NULL!	#NULL!	#NULL!	#NULL!	#NULL!	#NULL!	#NULL!	#NULL!
#NULL!	#NULL!	#NULL!	#NULL!	#NULL!	#NULL!	#NULL!	#NULL!	#NULL!	#NULL!	#NULL!	#NULL!	#NULL!	#NULL!	#NULL!	#NULL!	#NULL!	#NULL!	#NULL!	#NULL!	#NULL!	#NULL!	#NULL!	#NULL!	#NULL!	#NULL!	#NULL!	#NULL!	#NULL!	#NULL!	#NULL!	#NULL!	#NULL!	#NULL!	#NULL!	#NULL!	#NULL!	#NULL!	#NULL!	#NULL!	#NULL!	#NULL!	#NULL!	#NULL!	#NULL!	#NULL!	#NULL!	#NULL!	#NULL!	#NULL!
#NULL!	#NULL!	#NULL!	#NULL!	#NULL!	#NULL!	#NULL!	#NULL!	#NULL!	#NULL!	#NULL!	#NULL!	#NULL!	#NULL!	#NULL!	#NULL!	#NULL!	#NULL!	#NULL!	#NULL!	#NULL!	#NULL!	#NULL!	#NULL!	#NULL!	#NULL!	#NULL!	#NULL!	#NULL!	#NULL!	#NULL!	#NULL!	#NULL!	#NULL!	#NULL!	#NULL!	#NULL!	#NULL!	#NULL!	#NULL!	#NULL!	#NULL!	#NULL!	#NULL!	#NULL!	#NULL!	#NULL!	#NULL!	#NULL!	#NULL!
#NULL!	#NULL!	#NULL!	#NULL!	#NULL!	#NULL!	#NULL!	#NULL!	#NULL!	#NULL!	#NULL!	#NULL!	#NULL!	#NULL!	#NULL!	#NULL!	#NULL!	#NULL!	#NULL!	#NULL!	#NULL!	#NULL!	#NULL!	#NULL!	#NULL!	#NULL!	#NULL!	#NULL!	#NULL!	#NULL!	#NULL!	#NULL!	#NULL!	#NULL!	#NULL!	#NULL!	#NULL!	#NULL!	#NULL!	#NULL!	#NULL!	#NULL!	#NULL!	#NULL!	#NULL!	#NULL!	#NULL!	#NULL!	#NULL!	#NULL!
#NULL!	#NULL!	#NULL!	#NULL!	#NULL!	#NULL!	#NULL!	#NULL!	#NULL!	#NULL!	#NULL!	#NULL!	#NULL!	#NULL!	#NULL!	#NULL!	#NULL!	#NULL!	#NULL!	#NULL!	#NULL!	#NULL!	#NULL!	#NULL!	#NULL!	#NULL!	#NULL!	#NULL!	#NULL!	#NULL!	#NULL!	#NULL!	#NULL!	#NULL!	#NULL!	#NULL!	#NULL!	#NULL!	#NULL!	#NULL!	#NULL!	#NULL!	#NULL!	#NULL!	#NULL!	#NULL!	#NULL!	#NULL!	#NULL!	#NULL!
#NULL!	#NULL!	#NULL!	#NULL!	#NULL!	#NULL!	#NULL!	#NULL!	#NULL!	#NULL!	#NULL!	#NULL!	#NULL!	#NULL!	#NULL!	#NULL!	#NULL!	#NULL!	#NULL!	#NULL!	#NULL!	#NULL!	#NULL!	#NULL!	#NULL!	#NULL!	#NULL!	#NULL!	#NULL!	#NULL!	#NULL!	#NULL!	#NULL!	#NULL!	#NULL!	#NULL!	#NULL!	#NULL!	#NULL!	#NULL!	#NULL!	#NULL!	#NULL!	#NULL!	#NULL!	#NULL!	#NULL!	#NULL!	#NULL!	#NULL!
#NULL!	#NULL!	#NULL!	#NULL!	#NULL!	#NULL!	#NULL!	#NULL!	#NULL!	#NULL!	#NULL!	#NULL!	#NULL!	#NULL!	#NULL!	#NULL!	#NULL!	#NULL!	#NULL!	#NULL!	#NULL!	#NULL!	#NULL!	#NULL!	#NULL!	#NULL!	#NULL!	#NULL!	#NULL!	#NULL!	#NULL!	#NULL!	#NULL!	#NULL!	#NULL!	#NULL!	#NULL!	#NULL!	#NULL!	#NULL!	#NULL!	#NULL!	#NULL!	#NULL!	#NULL!	#NULL!	#NULL!	#NULL!	#NULL!	#NULL!
#NULL!	#NULL!	#NULL!	#NULL!	#NULL!	#NULL!	#NULL!	#NULL!	#NULL!	#NULL!	#NULL!	#NULL!	#NULL!	#NULL!	#NULL!	#NULL!	#NULL!	#NULL!	#NULL!	#NULL!	#NULL!	#NULL!	#NULL!	#NULL!	#NULL!	#NULL!	#NULL!	#NULL!	#NULL!	#NULL!	#NULL!	#NULL!	#NULL!	#NULL!	#NULL!	#NULL!	#NULL!	#NULL!	#NULL!	#NULL!	#NULL!	#NULL!	#NULL!	#NULL!	#NULL!	#NULL!	#NULL!	#NULL!	#NULL!	#NULL!
#NULL!	#NULL!	#NULL!	#NULL!	#NULL!	#NULL!	#NULL!	#NULL!	#NULL!	#NULL!	#NULL!	#NULL!	#NULL!	#NULL!	#NULL!	#NULL!	#NULL!	#NULL!	#NULL!	#NULL!	#NULL!	#NULL!	#NULL!	#NULL!	#NULL!	#NULL!	#NULL!	#NULL!	#NULL!	#NULL!	#NULL!	#NULL!	#NULL!	#NULL!	#NULL!	#NULL!	#NULL!	#NULL!	#NULL!	#NULL!	#NULL!	#NULL!	#NULL!	#NULL!	#NULL!	#NULL!	#NULL!	#NULL!	#NULL!	#NULL!
#NULL!	#NULL!	#NULL!	#NULL!	#NULL!	#NULL!	#NULL!	#NULL!	#NULL!	#NULL!	#NULL!	#NULL!	#NULL!	#NULL!	#NULL!	#NULL!	#NULL!	#NULL!	#NULL!	#NULL!	#NULL!	#NULL!	#NULL!	#NULL!	#NULL!	#NULL!	#NULL!	#NULL!	#NULL!	#NULL!	#NULL!	#NULL!	#NULL!	#NULL!	#NULL!	#NULL!	#NULL!	#NULL!	#NULL!	#NULL!	#NULL!	#NULL!	#NULL!	#NULL!	#NULL!	#NULL!	#NULL!	#NULL!	#NULL!	#NULL!
#NULL!	#NULL!	#NULL!	#NULL!	#NULL!	#NULL!	#NULL!	#NULL!	#NULL!	#NULL!	#NULL!	#NULL!	#NULL!	#NULL!	#NULL!	#NULL!	#NULL!	#NULL!	#NULL!	#NULL!	#NULL!	#NULL!	#NULL!	#NULL!	#NULL!	#NULL!	#NULL!	#NULL!	#NULL!	#NULL!	#NULL!	#NULL!	#NULL!	#NULL!	#NULL!	#NULL!	#NULL!	#NULL!	#NULL!	#NULL!	#NULL!	#NULL!	#NULL!	#NULL!	#NULL!	#NULL!	#NULL!	#NULL!	#NULL!	#NULL!
#NULL!	#NULL!	#NULL!	#NULL!	#NULL!	#NULL!	#NULL!	#NULL!	#NULL!	#NULL!	#NULL!	#NULL!	#NULL!	#NULL!	#NULL!	#NULL!	#NULL!	#NULL!	#NULL!	#NULL!	#NULL!	#NULL!	#NULL!	#NULL!	#NULL!	#NULL!	#NULL!	#NULL!	#NULL!	#NULL!	#NULL!	#NULL!	#NULL!	#NULL!	#NULL!	#NULL!	#NULL!	#NULL!	#NULL!	#NULL!	#NULL!	#NULL!	#NULL!	#NULL!	#NULL!	#NULL!	#NULL!	#NULL!	#NULL!	#NULL!
#NULL!	#NULL!	#NULL!	#NULL!	#NULL!	#NULL!	#NULL!	#NULL!	#NULL!	#NULL!	#NULL!	#NULL!	#NULL!	#NULL!	#NULL!	#NULL!	#NULL!	#NULL!	#NULL!	#NULL!	#NULL!	#NULL!	#NULL!	#NULL!	#NULL!	#NULL!	#NULL!	#NULL!	#NULL!	#NULL!	#NULL!	#NULL!	#NULL!	#NULL!	#NULL!	#NULL!	#NULL!	#NULL!	#NULL!	#NULL!	#NULL!	#NULL!	#NULL!	#NULL!	#NULL!	#NULL!	#NULL!	#NULL!	#NULL!	#NULL!
#NULL!	#NULL!	#NULL!	#NULL!	#NULL!	#NULL!	#NULL!	#NULL!	#NULL!	#NULL!	#NULL!	#NULL!	#NULL!	#NULL!	#NULL!	#NULL!	#NULL!	#NULL!	#NULL!	#NULL!	#NULL!	#NULL!	#NULL!	#NULL!	#NULL!	#NULL!	#NULL!	#NULL!	#NULL!	#NULL!	#NULL!	#NULL!	#NULL!	#NULL!	#NULL!	#NULL!	#NULL!	#NULL!	#NULL!	#NULL!	#NULL!	#NULL!	#NULL!	#NULL!	#NULL!	#NULL!	#NULL!	#NULL!	#NULL!	#NULL!
#NULL!	#NULL!	#NULL!	#NULL!	#NULL!	#NULL!	#NULL!	#NULL!	#NULL!	#NULL!	#NULL!	#NULL!	#NULL!	#NULL!	#NULL!	#NULL!	#NULL!	#NULL!	#NULL!	#NULL!	#NULL!	#NULL!	#NULL!	#NULL!	#NULL!	#NULL!	#NULL!	#NULL!	#NULL!	#NULL!	#NULL!	#NULL!	#NULL!	#NULL!	#NULL!	#NULL!	#NULL!	#NULL!	#NULL!	#NULL!	#NULL!	#NULL!	#NULL!	#NULL!	#NULL!	#NULL!	#NULL!	#NULL!	#NULL!	#NULL!
#NULL!	#NULL!	#NULL!	#NULL!	#NULL!	#NULL!	#NULL!	#NULL!	#NULL!	#NULL!	#NULL!	#NULL!	#NULL!	#NULL!	#NULL!	#NULL!	#NULL!	#NULL!	#NULL!	#NULL!	#NULL!	#NULL!	#NULL!	#NULL!	#NULL!	#NULL!	#NULL!	#NULL!	#NULL!	#NULL!	#NULL!	#NULL!	#NULL!	#NULL!	#NULL!	#NULL!	#NULL!	#NULL!	#NULL!	#NULL!	#NULL!	#NULL!	#NULL!	#NULL!	#NULL!	#NULL!	#NULL!	#NULL!	#NULL!	#NULL!
#NULL!	#NULL!	#NULL!	#NULL!	#NULL!	#NULL!	#NULL!	#NULL!	#NULL!	#NULL!	#NULL!	#NULL!	#NULL!	#NULL!	#NULL!	#NULL!	#NULL!	#NULL!	#NULL!	#NULL!	#NULL!	#NULL!	#NULL!	#NULL!	#NULL!	#NULL!	#NULL!	#NULL!	#NULL!	#NULL!	#NULL!	#NULL!	#NULL!	#NULL!	#NULL!	#NULL!	#NULL!	#NULL!	#NULL!	#NULL!	#NULL!	#NULL!	#NULL!	#NULL!	#NULL!	#NULL!	#NULL!	#NULL!	#NULL!	#NULL!
#NULL!	#NULL!	#NULL!	#NULL!	#NULL!	#NULL!	#NULL!	#NULL!	#NULL!	#NULL!	#NULL!	#NULL!	#NULL!	#NULL!	#NULL!	#NULL!	#NULL!	#NULL!	#NULL!	#NULL!	#NULL!	#NULL!	#NULL!	#NULL!	#NULL!	#NULL!	#NULL!	#NULL!	#NULL!	#NULL!	#NULL!	#NULL!	#NULL!	#NULL!	#NULL!	#NULL!	#NULL!	#NULL!	#NULL!	#NULL!	#NULL!	#NULL!	#NULL!	#NULL!	#NULL!	#NULL!	#NULL!	#NULL!	#NULL!	#NULL!
#NULL!	#NULL!	#NULL!	#NULL!	#NULL!	#NULL!	#NULL!	#NULL!	#NULL!	#NULL!	#NULL!	#NULL!	#NULL!	#NULL!	#NULL!	#NULL!	#NULL!	#NULL!	#NULL!	#NULL!	#NULL!	#NULL!	#NULL!	#NULL!	#NULL!	#NULL!	#NULL!	#NULL!	#NULL!	#NULL!	#NULL!	#NULL!	#NULL!	#NULL!	#NULL!	#NULL!	#NULL!	#NULL!	#NULL!	#NULL!	#NULL!	#NULL!	#NULL!	#NULL!	#NULL!	#NULL!	#NULL!	#NULL!	#NULL!	#NULL!
#NULL!	#NULL!	#NULL!	#NULL!	#NULL!	#NULL!	#NULL!	#NULL!	#NULL!	#NULL!	#NULL!	#NULL!	#NULL!	#NULL!	#NULL!	#NULL!	#NULL!	#NULL!	#NULL!	#NULL!	#NULL!	#NULL!	#NULL!	#NULL!	#NULL!	#NULL!	#NULL!	#NULL!	#NULL!	#NULL!	#NULL!	#NULL!	#NULL!	#NULL!	#NULL!	#NULL!	#NULL!	#NULL!	#NULL!	#NULL!	#NULL!	#NULL!	#NULL!	#NULL!	#NULL!	#NULL!	#NULL!	#NULL!	#NULL!	#NULL!
#NULL!	#NULL!	#NULL!	#NULL!	#NULL!	#NULL!	#NULL!	#NULL!	#NULL!	#NULL!	#NULL!	#NULL!	#NULL!	#NULL!	#NULL!	#NULL!	#NULL!	#NULL!	#NULL!	#NULL!	#NULL!	#NULL!	#NULL!	#NULL!	#NULL!	#NULL!	#NULL!	#NULL!	#NULL!	#NULL!	#NULL!	#NULL!	#NULL!	#NULL!	#NULL!	#NULL!	#NULL!	#NULL!	#NULL!	#NULL!	#NULL!	#NULL!	#NULL!	#NULL!	#NULL!	#NULL!	#NULL!	#NULL!	#NULL!	#NULL!
#NULL!	#NULL!	#NULL!	#NULL!	#NULL!	#NULL!	#NULL!	#NULL!	#NULL!	#NULL!	#NULL!	#NULL!	#NULL!	#NULL!	#NULL!	#NULL!	#NULL!	#NULL!	#NULL!	#NULL!	#NULL!	#NULL!	#NULL!	#NULL!	#NULL!	#NULL!	#NULL!	#NULL!	#NULL!	#NULL!	#NULL!	#NULL!	#NULL!	#NULL!	#NULL!	#NULL!	#NULL!	#NULL!	#NULL!	#NULL!	#NULL!	#NULL!	#NULL!	#NULL!	#NULL!	#NULL!	#NULL!	#NULL!	#NULL!	#NULL!
#NULL!	#NULL!	#NULL!	#NULL!	#NULL!	#NULL!	#NULL!	#NULL!	#NULL!	#NULL!	#NULL!	#NULL!	#NULL!	#NULL!	#NULL!	#NULL!	#NULL!	#NULL!	#NULL!	#NULL!	#NULL!	#NULL!	#NULL!	#NULL!	#NULL!	#NULL!	#NULL!	#NULL!	#NULL!	#NULL!	#NULL!	#NULL!	#NULL!	#NULL!	#NULL!	#NULL!	#NULL!	#NULL!	#NULL!	#NULL!	#NULL!	#NULL!	#NULL!	#NULL!	#NULL!	#NULL!	#NULL!	#NULL!	#NULL!	#NULL!
[truncated: 76 more columns]
